# Supplementary material for: Development of a nomogram model for predicting dementia risk in the older adult population of Weifang, Shandong Province, China: based on the biopsychosocial model
Source: Front Public Health. 2025 Feb 21;13:1499820. doi: 10.3389/fpubh.2025.1499820 (PMC11885151; doi:10.3389/fpubh.2025.1499820)
Supplement: Supplementary file 2 [file Data_Sheet_2.xlsx]

## Sheet: Sheet1
Dementia	Gender	Age	Physical Disability	Brain Injury	Visual Abnormality	Hearing Abnormality	Language Function Abnormality	Hypertension	Hyperlipidemia	Diabetes	Tumor	Chronic Lung Disease	Liver Disease	Heart Disease	Stroke	Kidney Disease	Arthritis	Asthma	Annoyed by Small Things	Attention Deficit	Low Mood	Difficulty in Doing Things	Hope	Fear	Poor Sleep	Happy	Lonely	Negative Thinking	Self-Rated Health Status	Emotional and Mental Issues	Smoking	Drinking	Sleep Duration	Napping	Education Level	Marital Status	Residence	Living Alone	Socialization	Intense Physical Activity	Moderate Physical Activity	Light Physical Activity	Physical Check-up	Health Insurance	Community Elderly Care Services |
1	1	1	1	1	1	1	1	1	1	1	1	1	1	1	1	1	1	1	1	1	3	4	1	1	1	4	3	3	2	1	1	1	2	2	1	2	1	2	1	2	2	2	2	2	2
1	1	1	1	1	1	1	1	1	1	1	1	1	1	1	1	1	1	1	2	1	3	1	4	1	2	2	1	1	2	1	1	1	2	2	1	1	1	1	2	1	2	1	2	1	2
1	1	2	1	1	1	1	1	1	1	1	1	1	1	1	1	1	1	1	3	1	1	1	4	1	2	4	1	1	2	1	1	2	2	2	1	2	1	2	2	1	2	2	2	1	2
0	2	1	1	1	1	1	1	1	1	1	1	1	1	1	1	1	1	1	1	2	3	1	2	1	3	4	1	2	2	1	1	1	2	2	1	2	1	1	2	2	2	2	2	1	2
1	2	2	1	1	1	1	1	1	1	1	1	1	1	1	1	1	1	1	1	3	3	3	2	1	2	3	2	1	2	1	2	2	2	2	1	1	1	1	1	1	1	2	2	1	2
1	1	2	1	1	1	1	1	1	1	1	1	1	1	1	1	2	1	2	4	3	3	2	3	1	4	2	4	1	1	1	2	1	3	2	1	2	1	1	2	1	1	2	2	1	2
1	2	1	1	1	1	2	1	2	1	1	1	1	1	1	1	1	2	1	2	3	3	4	3	2	3	3	2	3	2	1	1	1	3	1	1	2	1	1	2	2	2	2	2	1	2
1	1	2	1	1	1	1	1	1	1	1	1	1	1	1	1	1	2	1	1	1	1	1	4	1	1	4	1	1	1	1	1	1	1	2	1	2	1	1	2	1	1	2	2	2	2
1	2	2	1	1	1	2	1	1	1	1	1	1	1	1	1	1	2	1	1	4	1	3	4	4	1	4	1	1	2	1	1	1	2	1	1	1	1	1	1	1	1	2	2	1	2
1	1	1	1	2	1	2	1	2	2	2	1	1	1	2	2	1	1	1	3	2	1	3	4	4	2	4	3	1	1	1	1	1	2	1	1	2	1	1	1	1	2	2	2	1	2
1	1	1	1	1	1	2	1	2	1	1	1	1	1	1	1	1	2	1	1	4	4	3	3	1	4	2	4	3	2	1	1	1	1	1	1	2	1	1	2	2	2	2	2	1	2
1	2	1	1	1	1	1	1	1	1	1	1	1	1	1	1	1	2	1	4	4	1	4	4	1	4	4	4	1	1	1	2	2	1	1	1	2	1	1	1	2	1	2	2	1	2
0	2	2	1	2	1	1	1	1	1	1	1	1	1	1	2	1	1	1	3	4	2	2	4	1	1	1	1	1	1	1	1	1	2	1	1	2	1	1	2	2	2	2	2	1	2
0	2	1	1	1	1	1	1	1	1	1	1	1	1	1	1	1	1	1	1	2	3	1	1	1	1	1	4	1	1	1	1	2	2	1	1	2	1	2	2	2	2	2	2	1	2
1	2	2	1	1	1	1	1	1	1	1	1	1	1	1	1	1	1	1	1	1	1	1	4	1	1	4	1	1	3	1	1	1	3	2	1	2	1	1	2	1	1	2	2	1	2
1	1	1	1	1	1	1	1	1	1	1	1	2	1	2	1	1	1	1	1	1	1	1	4	1	1	4	1	1	2	1	1	1	1	2	1	2	1	1	2	1	1	2	2	1	2
1	2	1	1	1	2	1	1	2	1	2	1	1	1	1	2	2	2	1	1	4	1	1	3	1	1	4	1	1	2	1	2	2	1	2	1	2	1	1	2	2	2	2	2	1	2
1	2	1	1	1	2	2	1	2	1	1	1	1	1	1	1	1	1	1	1	1	1	1	1	1	1	4	1	1	2	1	1	1	2	1	1	2	1	1	1	1	1	2	2	1	2
1	1	1	1	1	1	1	1	1	1	1	1	1	1	1	1	1	1	1	1	1	1	3	3	1	4	1	4	1	1	1	2	2	1	1	1	2	1	1	1	2	1	2	2	1	2
1	1	2	1	1	1	1	1	1	1	1	1	1	1	1	1	1	1	1	1	1	1	1	3	1	1	4	1	1	1	1	1	1	1	2	1	2	1	1	1	2	2	2	2	1	2
1	1	1	1	1	1	1	1	1	1	1	1	1	1	1	1	1	1	1	1	1	1	2	3	2	1	4	1	1	1	1	1	1	2	1	1	2	1	1	1	1	1	2	2	1	1
1	2	1	1	1	1	1	1	1	1	1	1	1	1	1	1	1	1	1	1	1	1	1	4	1	4	2	1	1	2	1	1	1	1	1	1	2	1	1	2	1	1	2	2	1	2
1	1	1	1	1	1	1	1	1	1	1	1	1	1	1	1	1	1	1	3	2	3	1	3	1	1	3	2	3	3	1	1	1	3	1	2	2	1	1	2	1	1	2	2	1	1
1	2	2	1	1	1	1	1	1	1	1	1	2	1	1	1	1	1	1	1	1	1	1	4	1	4	4	1	1	2	1	1	1	2	1	1	2	1	1	1	1	1	1	2	1	1
1	1	1	1	1	1	1	1	1	1	1	1	1	1	1	1	1	2	1	1	1	1	1	4	1	1	4	1	1	2	1	1	1	2	1	1	1	1	1	1	1	1	2	2	1	1
1	1	1	2	1	2	1	1	1	1	1	1	1	1	1	1	1	1	1	4	4	1	1	2	4	1	1	4	4	1	1	1	1	1	1	1	2	1	2	2	1	1	1	2	1	2
1	1	1	1	1	1	1	1	1	1	1	1	1	1	1	1	1	1	1	2	2	2	2	3	1	1	3	1	1	1	1	1	1	2	2	1	2	1	1	1	1	1	1	2	1	1
1	2	2	1	1	1	1	1	1	1	1	1	1	1	1	1	1	1	1	3	3	3	3	3	3	1	2	4	4	2	1	1	2	3	1	1	2	1	1	2	2	1	2	2	1	1
1	1	1	1	1	1	1	1	1	1	1	1	1	1	1	1	1	1	1	1	2	2	2	1	2	2	4	1	1	2	1	1	2	2	1	2	2	1	1	2	2	1	2	2	1	2
1	1	3	1	1	1	1	1	1	1	1	1	2	1	1	1	1	1	2	2	1	2	1	4	3	1	4	1	1	2	1	1	1	1	1	2	2	3	2	1	1	1	2	2	1	2
1	2	1	1	1	1	1	1	2	1	1	1	2	2	1	1	1	1	1	2	4	1	4	4	2	2	4	2	4	1	1	1	2	2	1	1	2	1	1	2	2	2	2	2	1	2
1	2	2	1	1	1	1	1	1	1	1	1	1	1	1	1	1	1	1	2	4	3	1	1	1	4	2	1	1	2	1	1	1	1	1	1	1	1	2	1	1	1	1	2	1	1
1	2	1	1	1	1	1	1	2	1	1	1	1	1	1	1	1	1	1	2	2	2	1	1	1	4	4	1	1	1	1	2	1	1	2	2	2	1	1	1	1	1	1	2	1	1
1	2	3	1	1	1	1	1	2	1	1	1	1	1	1	1	1	2	1	1	1	1	1	4	1	1	4	1	1	2	1	2	1	1	1	1	1	1	1	1	1	1	1	2	1	1
1	1	2	1	1	1	1	1	1	1	1	1	1	1	1	1	1	1	1	2	2	2	2	1	1	2	4	1	2	3	1	2	1	3	1	1	2	3	1	1	1	0	2	2	1	1
1	1	1	1	1	1	2	1	1	1	1	1	1	1	1	1	1	1	1	1	3	1	1	1	1	4	1	4	1	3	1	1	2	2	1	1	2	1	1	2	1	0	2	2	1	1
1	1	1	1	1	1	1	1	1	1	1	1	2	1	1	2	1	2	1	1	4	1	1	4	1	1	4	1	1	1	1	1	1	2	2	1	2	1	1	2	2	0	2	2	1	1
0	1	1	1	2	1	1	1	2	1	1	1	1	1	1	1	1	1	1	1	3	3	3	3	1	4	3	4	1	2	1	2	2	2	1	1	1	1	1	2	2	2	2	2	1	2
1	1	2	1	1	1	1	1	1	1	1	1	1	1	1	1	1	1	1	2	2	2	2	3	1	2	2	3	2	1	1	1	1	2	1	1	2	1	1	1	1	1	1	2	1	1
1	2	1	1	1	2	1	1	1	1	1	1	1	1	1	1	1	1	1	2	2	2	2	2	2	2	3	2	2	2	1	1	1	2	1	3	2	1	2	2	1	0	2	2	1	1
1	1	1	1	1	1	1	1	1	1	1	1	1	2	1	1	1	1	1	1	1	1	1	4	1	1	4	1	1	1	1	1	1	2	2	3	2	1	2	1	1	0	2	2	1	1
1	1	2	1	1	1	1	1	1	1	1	1	2	1	1	1	1	1	1	2	3	1	2	3	2	4	3	1	2	1	1	1	1	1	1	1	2	1	1	1	1	0	2	2	1	1
1	1	1	1	1	1	1	1	1	1	1	1	1	1	1	1	1	1	1	1	1	1	4	1	1	4	4	1	1	3	1	1	1	2	2	1	2	1	1	2	2	0	2	2	1	1
1	1	1	1	1	1	1	1	1	1	1	1	1	1	1	1	1	1	1	1	1	1	1	4	1	1	4	1	1	2	1	1	1	2	2	1	1	1	1	1	2	0	1	2	1	1
1	2	1	1	1	1	1	1	2	1	1	1	1	1	1	1	1	1	1	1	1	1	2	4	1	2	4	1	1	1	1	1	1	3	2	1	2	1	2	1	1	1	2	2	1	1
1	2	3	1	1	1	1	1	1	1	1	1	1	2	1	1	1	2	1	1	1	1	1	4	1	1	4	1	1	1	1	1	2	2	1	1	1	1	1	2	2	1	2	2	1	2
1	1	2	1	1	1	1	1	1	1	1	1	1	1	1	1	1	1	1	1	1	1	1	1	1	4	4	1	1	1	1	1	1	2	1	1	2	3	2	1	1	0	2	2	2	1
1	2	1	1	1	1	1	1	1	1	1	1	1	1	1	1	1	1	1	1	2	1	2	4	1	1	4	1	1	1	1	1	1	3	1	1	2	3	1	2	1	0	2	2	1	1
1	2	2	1	1	2	1	1	1	1	1	1	1	1	1	1	1	2	1	3	4	4	3	2	1	2	4	3	1	3	1	1	2	1	1	1	1	1	1	1	2	1	2	2	1	1
1	1	1	1	1	1	1	1	2	1	1	1	1	1	1	1	1	1	1	1	3	1	1	1	1	2	1	1	1	1	1	1	1	1	2	1	2	1	2	2	1	1	2	2	1	1
1	2	1	1	1	1	1	1	1	1	1	1	1	1	1	1	1	1	1	4	4	4	4	2	1	3	4	1	1	1	1	1	1	1	2	1	2	1	1	1	1	1	1	2	2	1
1	2	1	1	1	1	1	1	1	1	1	1	1	1	1	1	1	1	1	2	1	3	4	4	1	2	2	1	1	3	1	1	1	3	1	1	2	1	1	1	1	1	1	2	1	1
1	2	1	1	1	1	1	1	1	1	1	1	1	1	1	1	1	1	1	3	3	3	4	4	1	1	3	1	1	2	1	1	2	2	2	1	2	1	1	1	2	0	1	2	1	1
1	2	1	1	1	1	1	1	1	1	1	1	1	1	1	1	1	1	1	1	1	1	1	4	1	4	4	1	1	2	1	1	1	2	1	1	2	1	1	2	2	1	2	2	1	1
1	1	1	1	1	1	1	1	1	2	1	1	1	1	1	1	1	2	1	1	1	4	4	4	1	1	4	1	1	1	1	1	1	2	1	1	1	1	1	2	2	1	2	2	1	1
1	1	1	1	1	1	1	1	1	1	1	1	1	1	1	1	1	1	1	1	1	1	1	1	1	1	4	1	1	3	1	1	2	2	2	1	2	1	2	2	1	1	2	2	1	1
1	1	1	1	1	1	1	1	1	2	1	1	1	1	2	1	1	1	1	1	1	1	2	4	1	3	1	1	1	3	1	1	2	3	1	1	2	1	1	1	1	0	2	2	1	1
1	2	2	1	1	1	1	1	1	1	1	1	1	1	1	1	1	1	1	1	1	3	3	4	1	3	4	1	1	1	1	1	2	1	1	1	2	1	1	1	1	1	1	2	1	1
1	2	1	1	1	1	1	1	1	1	1	1	1	1	1	1	1	1	1	1	1	1	1	1	1	1	3	1	1	1	1	2	2	1	1	1	2	1	1	1	1	1	2	2	1	1
1	2	1	1	1	1	1	1	1	1	1	1	1	1	2	1	1	1	1	3	4	4	4	3	1	3	3	3	4	1	1	1	1	1	1	1	2	1	1	1	1	1	2	2	1	1
1	1	1	1	1	1	1	1	1	1	1	1	1	1	1	2	1	1	1	2	1	3	1	1	3	4	3	2	1	1	1	1	1	1	1	1	2	1	1	1	2	1	2	2	1	1
1	2	2	1	1	1	1	1	1	1	1	1	1	1	1	1	1	1	1	2	1	1	1	4	1	1	4	3	1	3	1	2	2	2	2	1	1	1	1	1	1	1	2	2	1	1
1	2	2	1	1	1	1	1	1	1	1	1	1	2	1	1	1	1	1	1	1	1	2	3	1	1	3	1	1	1	1	1	1	1	2	1	1	1	1	1	1	1	2	1	2	1
1	2	4	1	1	1	1	1	1	1	1	1	1	1	1	1	1	1	1	1	1	1	1	1	1	1	4	1	1	2	1	1	1	2	2	1	1	1	1	1	1	1	2	2	1	2
1	1	2	1	1	1	1	1	1	1	1	1	1	1	1	1	1	1	1	1	1	1	1	1	1	1	4	1	1	3	1	1	1	2	1	1	2	1	1	2	1	1	2	2	1	1
1	1	1	1	2	1	1	1	1	1	1	1	2	1	1	1	1	1	1	1	1	1	1	1	1	2	4	1	1	2	1	1	1	2	2	1	2	1	1	2	1	1	1	2	1	1
1	1	1	2	1	1	1	1	2	1	1	1	1	1	1	1	1	1	1	1	1	1	1	1	1	1	4	1	1	1	1	2	1	1	2	1	2	1	1	1	1	1	1	2	1	1
1	1	2	1	1	1	1	1	1	1	1	1	1	1	1	1	1	1	1	1	1	1	1	1	1	2	4	1	1	3	1	1	1	2	2	1	2	1	1	2	2	2	2	2	1	2
1	1	2	1	1	1	1	1	1	1	1	1	1	1	1	1	1	1	1	1	1	1	1	4	1	1	4	1	1	1	1	1	1	2	2	1	1	1	1	1	1	1	2	2	1	1
1	2	1	1	1	1	1	1	1	1	1	1	2	1	1	1	1	2	1	1	1	1	1	2	1	1	3	1	1	1	1	1	1	1	2	1	2	1	1	2	2	2	2	2	1	2
1	2	2	1	1	1	1	1	1	1	1	1	1	1	1	1	2	1	1	1	1	1	1	1	1	1	1	1	1	2	1	2	2	2	2	1	2	1	1	2	1	1	2	2	1	1
1	1	1	1	1	1	1	1	1	1	1	1	1	1	1	1	1	1	1	1	1	3	4	4	1	4	3	4	4	1	1	2	1	2	2	1	2	1	1	1	2	1	1	2	1	2
1	2	1	1	1	1	1	1	1	1	1	1	1	1	1	1	1	1	1	1	1	1	3	3	1	1	4	1	1	2	1	1	1	3	2	1	2	1	1	2	2	2	2	2	2	2
1	1	2	1	1	1	1	1	1	1	1	1	1	1	1	1	1	1	1	4	1	1	1	4	2	4	4	1	1	2	1	1	1	2	1	1	2	1	1	1	2	0	2	2	1	1
1	2	1	1	1	1	1	1	1	1	1	1	1	1	1	1	1	1	1	1	1	1	4	4	1	2	4	3	1	2	1	1	1	1	2	1	2	1	1	1	1	0	2	2	1	1
1	1	2	1	1	1	1	1	1	1	1	1	1	1	1	1	1	1	1	1	1	2	1	4	1	4	1	1	1	2	1	1	1	2	2	2	2	1	1	2	1	0	2	2	1	1
1	2	1	1	1	1	1	1	1	1	1	1	2	1	1	1	2	1	1	4	1	1	1	4	1	1	4	1	1	2	1	1	1	2	2	1	2	1	1	1	2	2	2	2	1	2
1	2	2	1	1	1	2	1	1	1	1	1	1	1	1	1	1	1	1	4	4	4	1	2	1	1	4	2	1	2	1	1	2	2	1	1	1	1	1	2	1	1	2	2	1	1
1	2	2	1	1	1	1	1	2	1	1	1	1	1	1	1	1	1	1	1	1	1	1	1	1	3	4	1	1	2	1	1	2	2	2	1	2	1	1	2	1	0	2	2	1	1
1	1	1	1	1	1	1	1	1	1	1	1	1	1	1	1	1	1	1	1	1	1	1	1	1	1	1	1	1	2	1	1	2	2	1	2	2	1	2	2	1	1	2	2	1	1
1	2	2	1	1	1	1	1	1	1	1	1	1	1	1	2	1	1	1	1	2	1	1	1	3	4	1	1	1	1	1	1	1	2	2	1	2	1	1	2	2	0	2	2	1	1
1	2	1	1	2	1	2	1	2	1	2	1	1	1	1	1	1	1	1	1	1	2	3	1	1	1	4	1	1	2	1	1	1	2	2	1	1	1	1	1	2	2	2	2	1	2
1	2	1	1	1	1	1	1	2	1	1	1	1	1	1	1	1	1	1	1	1	1	1	1	1	1	1	1	1	1	1	1	1	2	2	1	2	1	1	2	1	1	2	2	1	1
1	2	1	1	1	1	1	1	1	1	1	1	1	1	1	1	1	1	1	1	1	4	4	4	1	3	4	1	1	2	1	1	1	1	1	1	2	1	2	2	2	0	2	2	1	1
1	2	1	1	1	1	1	1	1	1	1	1	1	1	1	1	1	1	1	1	1	1	1	4	1	4	4	1	1	3	1	1	1	1	1	1	2	1	1	1	1	1	1	2	1	1
1	2	1	1	1	1	1	1	1	1	1	1	1	1	1	1	1	1	1	1	1	1	1	3	1	1	1	1	1	1	1	1	2	2	2	1	1	1	2	1	1	1	1	2	1	1
1	1	1	1	1	1	1	1	1	1	1	1	1	1	1	1	1	1	1	2	1	2	1	1	1	2	3	2	1	2	1	1	1	3	1	1	1	1	1	1	1	0	2	2	1	1
1	2	1	1	1	2	1	1	1	1	1	1	1	1	1	1	1	1	1	1	1	1	1	4	1	2	4	1	1	1	1	2	2	2	1	1	2	1	1	2	1	1	1	2	1	1
1	1	1	1	1	1	1	1	2	1	1	1	1	2	1	1	1	1	1	1	1	1	1	1	1	1	1	1	2	1	1	1	1	2	2	1	2	1	2	1	1	1	2	2	1	1
1	1	1	1	1	1	2	1	1	1	1	1	1	1	1	1	1	1	1	2	2	2	2	2	2	2	2	2	2	2	1	1	2	1	1	3	2	2	2	1	1	1	2	2	1	1
1	2	1	1	1	1	1	1	1	1	1	1	1	1	1	1	1	1	1	3	4	4	4	3	1	2	4	4	3	2	1	1	2	2	2	1	2	3	2	1	1	0	2	2	1	1
1	1	1	1	1	1	1	1	2	1	1	1	1	1	1	1	1	1	1	3	3	4	4	4	4	4	4	4	4	1	1	1	1	1	1	1	2	1	1	2	1	0	2	2	1	1
1	2	1	1	1	1	1	1	1	1	1	1	1	1	1	1	2	1	1	3	2	3	3	1	1	3	1	1	1	1	1	1	1	2	1	1	1	1	1	2	1	0	2	2	1	1
1	1	3	1	1	1	1	1	1	1	1	1	1	1	1	1	1	1	1	1	1	1	2	4	1	2	2	1	1	3	1	1	1	2	1	1	2	1	1	1	1	0	1	2	1	1
1	2	1	1	1	1	1	1	1	2	2	1	1	1	1	1	1	1	1	1	1	1	1	1	1	1	1	1	2	2	1	1	1	2	2	2	2	3	1	2	2	0	2	2	1	1
1	2	4	1	1	1	1	1	1	1	1	1	1	1	1	1	1	1	1	1	1	1	2	4	1	1	1	1	1	2	1	1	1	2	1	1	1	1	1	2	1	1	2	2	1	1
1	2	2	1	1	1	1	1	2	1	1	1	1	1	2	1	1	2	1	4	1	3	3	2	3	3	2	2	2	1	1	1	1	1	2	1	1	1	2	1	1	1	2	2	1	1
1	1	1	1	1	1	1	1	1	1	1	1	1	1	1	1	1	1	1	4	4	4	4	4	1	4	1	4	4	1	1	1	2	2	1	1	2	1	1	2	1	0	2	2	1	1
1	2	1	1	1	1	1	1	1	1	1	1	1	1	1	1	1	2	1	1	1	1	1	4	1	1	4	1	1	1	1	1	1	2	2	1	1	1	1	2	2	2	2	2	1	2
1	2	2	1	1	1	1	1	1	1	1	1	1	1	1	1	1	1	1	1	1	1	1	1	1	1	1	1	1	2	1	1	1	2	2	2	1	1	1	2	1	2	2	2	1	2
1	2	1	1	1	1	1	1	1	1	1	1	1	1	1	1	1	1	1	4	1	4	4	1	1	3	3	1	3	2	1	1	1	1	1	1	1	1	1	1	1	1	2	2	1	1
1	2	2	1	1	1	1	1	1	1	1	1	1	1	1	1	1	1	1	3	3	3	1	1	2	3	2	3	2	2	1	1	1	1	1	1	1	1	2	2	2	1	2	2	1	1
1	2	1	1	1	1	1	1	2	1	1	1	1	1	1	1	1	1	1	4	2	3	3	3	4	4	1	1	4	2	1	1	2	2	2	1	2	1	1	2	1	1	2	2	1	1
1	1	2	1	1	1	1	1	1	1	1	1	1	1	1	1	1	1	1	1	1	1	1	1	1	2	4	1	1	2	1	1	1	2	1	4	2	1	2	1	2	1	2	2	1	1
1	2	1	1	2	1	1	1	1	1	1	1	1	1	1	1	1	1	1	3	2	2	2	3	1	3	2	1	1	1	1	1	1	2	2	1	2	1	1	1	1	2	1	2	1	2
1	1	2	1	1	1	1	1	1	1	1	1	1	1	1	1	1	1	1	4	3	4	3	3	1	4	2	4	2	2	1	1	2	1	1	3	2	1	1	2	1	0	2	2	2	1
1	1	1	1	1	1	1	1	1	1	1	1	1	1	1	1	1	1	1	1	1	1	2	1	1	3	1	1	1	2	1	1	2	1	2	1	1	1	1	2	1	0	2	2	1	1
1	2	2	1	1	1	1	1	1	1	1	1	2	1	1	1	1	1	1	4	4	3	3	1	1	4	3	1	1	1	1	1	1	2	1	1	1	1	1	2	2	0	2	2	1	1
1	2	2	1	1	1	1	1	1	1	1	1	1	1	1	1	1	1	1	3	3	3	2	4	1	1	1	4	1	1	1	1	2	1	2	1	2	1	1	1	1	1	2	2	1	2
1	2	2	1	1	1	1	1	1	1	1	1	1	1	1	1	1	1	1	1	1	2	2	1	1	3	1	4	1	2	1	1	1	2	2	1	2	1	1	1	2	0	2	2	1	1
1	2	2	1	1	1	2	1	1	1	1	1	2	1	1	1	1	2	1	4	4	2	4	4	4	4	1	4	4	2	1	1	1	2	2	1	1	1	1	1	2	2	2	2	1	2
1	1	2	1	1	1	1	1	1	1	1	1	1	1	1	1	1	1	1	4	3	4	4	1	1	4	1	4	4	1	1	1	1	2	1	2	2	1	2	1	1	0	2	2	1	1
1	2	1	1	1	1	2	1	1	1	1	1	1	1	1	1	1	1	1	3	2	2	2	4	1	1	4	1	1	2	1	1	2	3	1	1	2	3	1	1	1	0	2	2	1	1
1	1	1	1	1	2	1	1	1	1	1	1	1	1	1	1	1	1	1	4	1	4	4	2	1	1	1	1	1	1	1	1	2	1	1	2	2	2	1	1	1	0	2	2	1	1
1	1	1	1	1	1	1	1	1	1	1	1	1	1	1	1	1	1	1	4	3	4	3	4	3	4	1	4	3	2	1	1	1	2	1	1	2	1	2	1	1	0	2	2	1	1
1	2	2	1	1	1	1	1	1	1	1	1	2	1	1	1	1	1	1	1	1	1	1	1	1	1	1	1	1	1	1	2	2	2	2	1	1	1	2	2	1	0	2	2	1	1
1	2	1	1	1	1	1	1	1	1	1	1	1	1	1	1	1	1	1	1	1	1	1	1	1	2	4	1	1	3	1	1	1	2	2	1	1	3	1	1	2	0	2	2	1	1
1	2	1	1	1	1	1	1	1	1	1	1	1	1	1	1	1	1	1	1	1	2	4	1	1	2	1	1	1	3	1	1	1	2	1	1	2	1	1	1	2	0	2	2	1	1
1	2	1	2	1	1	1	1	2	1	1	1	1	1	1	1	1	1	1	2	1	2	2	2	1	1	4	1	1	2	1	1	2	2	2	1	2	1	1	1	1	1	2	2	1	1
1	2	2	1	1	1	1	1	1	1	1	1	1	1	1	1	1	1	1	3	1	4	4	1	1	1	4	4	1	2	1	1	1	2	2	1	1	1	1	2	2	2	2	2	1	2
1	2	1	1	1	1	1	1	1	1	1	1	1	1	1	1	1	1	1	4	4	4	4	1	4	4	1	4	4	2	1	1	1	2	2	1	2	1	1	1	1	0	2	2	1	1
1	1	3	1	1	1	2	1	2	1	1	1	1	1	1	1	1	1	1	3	2	1	1	1	1	1	1	1	1	2	1	1	2	2	2	1	1	1	1	2	2	0	2	2	1	1
1	2	1	1	1	1	1	1	1	1	1	1	1	1	1	1	1	1	1	4	2	3	4	3	3	4	3	3	2	1	1	1	1	1	2	1	2	1	2	1	1	0	2	2	1	1
1	1	1	1	1	1	1	1	1	1	1	1	1	1	1	2	1	1	1	1	1	1	1	1	1	1	4	1	1	2	1	1	1	1	2	1	2	1	2	1	1	0	2	2	1	1
1	2	1	1	1	1	1	1	1	1	1	1	1	1	1	1	1	1	1	1	3	3	3	3	1	1	4	1	1	1	1	1	1	1	1	1	1	1	1	2	1	0	1	2	1	1
1	2	2	1	1	1	1	1	1	2	1	1	1	1	1	1	1	1	1	1	1	1	4	1	1	4	4	3	2	2	1	1	2	2	1	1	1	1	1	2	2	0	1	2	1	1
1	1	1	1	1	1	1	1	1	1	1	1	1	1	1	1	1	1	1	2	4	2	1	4	1	2	4	1	1	2	1	1	1	1	2	1	2	1	1	1	2	0	2	2	1	1
1	2	1	1	1	1	1	1	1	1	1	1	2	1	1	1	1	1	1	1	1	1	1	1	1	1	4	1	1	3	1	1	2	2	2	1	2	1	1	1	2	0	2	2	1	1
1	2	1	1	1	1	1	1	1	1	1	1	1	1	1	1	1	1	1	2	1	3	4	4	1	2	2	1	1	2	1	1	1	2	2	1	2	1	1	2	1	1	1	2	1	1
1	2	1	1	1	1	1	1	1	1	1	1	1	1	1	1	1	1	1	1	1	1	1	1	1	4	4	1	1	2	1	1	2	2	1	1	2	1	2	1	1	1	2	2	1	1
1	1	1	1	1	1	1	1	1	1	1	1	1	1	1	1	1	2	1	3	2	3	4	2	3	4	2	4	4	2	1	1	1	1	1	1	2	1	1	2	1	0	1	2	1	1
1	2	1	1	1	1	1	1	2	2	1	1	1	1	1	1	1	1	1	1	1	1	1	4	1	1	4	1	1	2	1	1	2	2	2	1	2	1	1	1	1	2	2	2	1	2
1	2	1	1	1	1	1	1	1	1	1	1	1	1	1	1	1	1	1	4	2	2	2	3	2	3	3	3	1	3	1	1	1	2	2	1	2	1	1	2	1	1	2	2	1	1
1	1	2	1	1	1	1	1	1	1	1	1	1	1	1	1	1	2	1	4	4	4	4	2	4	4	1	4	4	1	1	1	1	1	2	1	1	1	2	1	1	1	1	2	1	1
1	1	1	1	1	1	1	1	1	1	1	1	1	1	1	1	1	1	1	4	4	4	1	1	1	4	1	1	4	1	1	1	1	1	1	1	2	1	1	1	1	1	2	2	1	1
1	2	1	1	1	1	1	1	1	1	1	1	1	1	1	1	1	2	1	4	4	4	4	1	4	4	1	4	4	3	1	1	1	1	1	1	2	1	1	1	2	0	1	2	1	1
1	1	1	1	1	1	1	1	1	1	1	1	1	1	1	1	1	1	1	4	3	3	3	4	1	3	3	3	3	2	1	1	1	2	1	1	2	1	1	1	2	0	2	2	1	1
1	1	3	1	1	1	1	1	1	1	1	1	1	1	2	1	2	1	1	2	4	1	1	1	1	2	1	1	1	1	1	1	1	2	1	1	1	1	2	1	1	1	2	2	2	1
1	2	1	1	1	1	1	1	1	1	1	1	1	1	1	1	1	1	1	1	1	1	1	4	1	1	4	1	1	2	1	1	1	2	2	1	2	1	1	2	1	1	2	2	1	1
1	2	1	1	1	1	1	1	1	1	1	1	1	1	1	1	1	2	1	3	1	1	1	4	1	3	4	1	1	3	1	1	1	1	1	1	2	1	2	1	1	0	1	2	1	1
1	1	1	1	1	1	1	1	1	1	1	1	1	1	1	1	1	1	1	1	1	1	1	4	1	1	4	1	1	2	1	1	1	2	1	1	2	1	1	1	1	1	2	2	2	1
1	2	3	1	1	1	1	1	2	1	1	1	1	1	2	1	1	2	1	4	3	3	3	1	1	1	1	1	1	1	1	1	1	1	2	1	1	1	1	2	1	0	2	2	1	1
1	2	2	1	1	1	1	1	1	2	2	1	1	1	1	1	1	2	1	1	1	1	1	1	1	1	4	1	1	2	1	1	1	1	1	1	2	3	1	1	1	0	2	2	1	1
1	1	2	1	1	1	1	1	2	1	2	1	1	1	1	1	1	2	1	2	1	1	1	3	1	1	4	1	1	1	1	1	1	1	2	1	2	1	1	1	1	1	2	2	1	1
1	1	1	1	1	1	1	1	1	2	1	1	1	2	1	1	1	1	1	3	3	3	3	3	3	3	3	1	1	2	1	1	2	2	1	2	2	1	1	2	2	1	2	2	1	1
1	2	1	1	1	1	1	1	1	1	1	1	1	1	1	1	1	1	1	1	2	2	1	2	2	2	4	1	1	3	1	1	1	1	2	1	2	1	2	2	2	1	2	2	1	1
1	2	1	1	1	1	1	1	1	1	1	1	1	1	1	1	1	1	1	4	3	3	3	1	1	4	2	4	3	2	1	1	1	1	2	1	2	1	1	2	2	2	2	2	1	2
1	1	1	1	1	1	2	1	1	1	1	1	1	1	1	1	2	1	1	3	2	2	1	1	2	4	1	2	2	1	1	1	1	1	1	1	1	1	1	2	2	1	2	2	1	1
1	2	1	1	1	1	1	1	1	1	2	1	1	1	1	1	1	1	1	1	1	1	1	1	1	4	4	1	1	1	1	1	1	2	2	1	2	1	1	2	1	1	2	2	1	1
1	1	1	1	2	1	1	1	2	1	1	1	1	1	1	1	1	1	1	2	2	1	1	2	1	2	3	1	1	1	1	1	1	1	2	1	2	1	2	1	1	1	1	2	1	1
1	2	1	1	1	1	2	1	2	1	1	1	1	1	1	1	1	1	1	1	2	1	1	4	1	1	4	1	1	2	1	1	1	1	2	1	2	1	1	1	2	0	2	2	1	1
1	2	2	1	1	1	1	1	2	1	1	1	1	1	1	1	1	2	1	1	1	1	1	4	1	1	4	1	1	2	1	2	2	2	2	2	2	1	1	1	2	1	2	2	1	1
0	1	1	1	2	2	1	1	2	1	1	1	2	1	1	1	1	1	1	3	3	3	2	3	1	4	4	1	1	1	1	2	2	1	2	1	2	1	1	1	2	1	1	2	1	2
0	2	2	2	1	1	1	1	1	1	1	1	1	1	2	1	1	1	1	3	1	4	4	4	2	3	1	3	4	2	1	1	1	1	2	1	2	1	1	1	1	2	2	2	1	2
0	2	1	1	1	1	1	1	1	1	1	1	1	1	1	1	1	1	1	4	1	4	1	1	1	4	1	1	1	2	1	1	2	2	2	1	2	1	2	2	2	1	2	2	1	2
1	1	1	1	1	2	1	1	1	1	1	1	1	1	1	1	1	1	1	1	2	2	2	1	1	3	3	1	1	1	1	1	1	1	1	1	2	1	1	1	1	1	1	2	1	1
1	2	3	1	1	1	1	1	1	1	2	1	1	1	1	1	1	1	1	4	2	3	3	3	2	4	2	3	2	2	1	1	1	1	1	1	2	1	1	1	1	0	1	2	1	1
1	2	2	1	1	1	1	1	1	1	1	1	1	1	1	1	1	1	1	1	1	1	1	1	1	1	4	1	1	3	1	1	2	2	2	1	2	1	1	1	1	0	2	2	1	1
1	1	2	1	1	1	1	1	1	1	1	1	1	1	1	1	1	1	1	3	1	1	1	1	3	3	3	1	1	2	1	1	1	1	2	2	2	1	1	1	1	1	2	1	2	1
1	1	1	1	1	1	1	1	1	1	1	1	1	1	1	1	1	1	1	3	1	3	2	1	3	4	3	2	1	2	1	1	1	1	2	1	2	1	1	1	2	1	2	2	1	1
1	1	3	1	1	1	1	1	1	1	1	1	2	1	1	1	2	1	1	3	2	3	3	2	3	4	3	4	3	2	1	1	1	1	2	1	1	1	1	1	1	1	1	2	1	1
1	1	1	1	1	1	1	1	1	1	1	1	1	1	1	1	1	1	1	1	1	1	1	4	4	1	2	4	1	2	1	1	1	2	2	1	1	2	1	2	2	0	2	2	1	1
0	1	2	1	1	1	1	1	2	1	1	1	1	1	1	1	1	1	1	1	2	2	2	4	1	1	2	1	1	3	1	1	2	2	2	1	2	1	1	2	2	1	2	1	2	2
0	1	2	1	1	1	1	1	1	1	1	1	1	1	1	1	1	1	1	2	1	3	2	1	2	1	2	4	1	2	1	1	2	1	1	1	2	3	1	2	2	2	2	2	1	2
1	1	3	1	1	1	1	1	1	1	1	1	1	1	1	1	1	1	1	2	2	3	2	2	1	2	3	2	2	2	1	1	1	2	2	1	2	1	1	2	2	0	2	2	1	1
1	2	1	1	1	1	1	1	2	1	1	1	1	1	1	1	1	1	1	4	1	1	4	4	1	4	4	1	1	2	1	2	2	1	2	1	1	1	1	2	1	1	1	2	1	1
0	2	1	1	1	1	1	1	2	1	1	1	1	1	1	1	1	1	1	3	3	3	2	2	1	4	4	1	1	1	1	1	1	2	2	1	2	1	1	1	2	2	2	2	1	2
1	2	1	1	1	1	1	1	1	1	1	1	1	1	1	1	1	1	1	4	2	4	1	1	1	4	1	3	1	2	1	1	1	2	1	1	2	1	2	1	2	1	2	2	1	1
1	1	2	1	1	2	1	1	1	1	1	1	1	1	1	1	1	1	1	2	2	1	2	1	1	2	3	2	2	3	1	1	1	1	2	1	2	1	2	1	1	1	1	2	1	1
1	1	1	1	1	1	1	1	1	1	1	1	1	1	1	1	1	1	1	3	1	1	4	4	1	2	4	1	1	2	1	1	2	2	2	1	2	1	1	2	1	1	2	2	1	1
0	1	1	1	1	1	1	1	1	1	1	1	1	1	1	1	1	1	1	4	3	3	3	3	1	1	4	1	1	2	1	1	2	2	2	1	2	1	1	1	2	1	1	2	1	2
0	1	2	1	1	1	1	1	1	1	1	1	1	1	1	1	1	1	1	2	1	1	1	4	1	4	4	4	1	2	1	1	1	2	2	1	2	1	1	2	2	2	2	2	1	2
0	1	2	1	1	1	1	1	1	1	1	1	1	1	1	1	1	1	1	1	3	1	1	1	4	4	4	1	4	3	1	1	1	1	1	1	2	1	1	1	2	2	1	2	1	2
0	1	1	1	1	1	1	1	1	1	1	1	1	1	1	1	1	1	1	3	4	3	3	1	1	3	1	3	1	2	1	1	2	2	2	1	2	1	1	2	2	2	2	2	1	2
0	1	2	1	1	1	1	1	1	1	1	1	1	1	1	1	1	1	1	2	3	3	3	1	1	1	4	1	1	3	1	1	1	1	2	1	1	3	1	2	2	2	2	2	2	2
0	2	1	1	1	1	1	1	1	1	1	1	1	1	1	1	1	1	1	1	1	1	1	4	1	1	4	1	1	3	1	1	2	1	2	1	2	1	1	2	2	2	2	2	1	2
0	2	2	1	2	1	2	1	1	1	1	1	2	1	1	1	1	1	1	2	2	2	4	1	1	3	1	1	1	2	1	1	1	1	1	1	2	3	2	1	2	1	2	2	1	2
0	1	2	2	2	1	1	2	1	1	1	1	1	1	1	1	1	1	1	2	2	1	1	2	3	4	1	1	1	1	1	1	2	2	2	3	2	3	1	1	1	2	2	2	1	2
0	2	1	1	1	1	1	1	1	1	1	1	1	1	1	1	1	1	1	3	2	2	3	2	2	2	2	2	2	3	1	1	2	2	2	1	2	1	1	2	2	2	2	2	2	2
1	1	2	1	1	2	1	1	1	1	1	1	1	1	1	1	1	2	1	1	1	1	2	4	1	4	4	2	2	1	1	1	1	1	1	1	2	1	2	2	1	1	1	2	1	1
1	1	3	1	1	1	1	1	1	1	1	1	1	1	1	1	1	1	1	3	3	3	1	4	1	3	3	2	1	2	1	1	1	3	1	1	2	1	1	1	1	1	1	2	1	1
1	2	2	1	1	1	1	1	1	1	1	1	1	1	1	1	1	1	1	1	3	1	3	1	3	1	3	1	4	1	1	1	1	1	1	1	1	1	1	1	1	1	2	2	1	1
0	2	1	2	2	1	2	1	2	1	1	1	1	1	1	1	1	1	1	4	1	4	4	4	4	1	1	1	1	1	1	1	1	1	1	1	2	1	2	1	1	1	2	2	2	2
1	2	2	1	1	1	1	1	1	1	1	1	1	1	1	1	1	1	1	3	3	3	3	3	3	3	2	3	3	2	1	1	1	1	2	1	2	1	2	1	1	1	2	2	1	1
1	2	1	1	1	1	1	1	1	1	1	1	1	1	1	1	1	1	1	1	1	1	1	1	1	1	1	4	1	1	1	1	1	1	2	1	2	1	1	1	1	1	1	2	1	2
1	1	3	1	1	1	1	1	1	1	1	1	1	1	1	1	1	1	1	1	1	1	1	4	1	1	1	1	1	2	1	1	1	2	2	1	2	1	1	2	2	1	2	2	1	1
0	1	2	1	1	1	1	1	1	1	1	1	1	1	1	1	1	1	1	1	1	1	1	1	1	1	4	1	1	2	1	1	1	2	1	1	2	1	2	2	2	2	2	2	1	2
0	2	2	1	1	1	1	1	1	1	1	1	1	1	1	1	1	1	1	1	1	1	1	4	1	1	4	1	1	2	1	2	1	3	2	1	2	3	1	2	2	2	2	2	1	2
0	1	1	1	1	1	1	1	1	1	1	1	1	1	1	1	1	1	1	3	4	3	3	4	2	1	2	3	1	2	1	1	1	1	2	2	2	1	1	1	2	2	2	2	1	2
1	2	3	1	1	1	1	1	1	1	2	1	1	1	1	1	1	1	1	4	4	3	4	1	1	4	1	1	3	2	1	2	2	1	1	1	1	1	2	2	1	1	2	2	1	2
0	1	1	1	1	1	1	1	1	1	1	1	1	1	1	1	1	1	1	2	3	3	1	4	2	2	4	1	2	1	1	1	1	2	1	3	2	1	2	2	2	1	2	2	1	2
0	1	2	1	1	1	1	1	2	1	1	1	2	1	2	1	1	2	1	1	4	4	2	4	3	4	3	3	4	1	1	1	1	1	2	1	1	1	2	2	2	2	2	2	2	2
0	2	2	1	1	1	1	1	1	1	1	1	1	1	1	1	1	1	1	3	1	1	1	3	1	1	3	1	1	2	1	1	1	1	1	1	2	3	1	2	2	1	2	2	2	2
0	2	1	1	1	1	1	1	1	1	1	1	1	2	1	1	1	1	1	2	2	3	2	4	1	3	4	1	1	2	1	1	2	2	2	2	2	3	1	2	1	2	2	2	2	2
0	2	1	1	1	1	1	1	2	1	1	1	1	1	1	1	1	1	1	1	1	1	1	1	1	1	4	1	1	3	1	1	1	2	1	3	2	3	1	2	1	1	2	2	2	2
0	2	2	1	1	1	1	1	1	1	1	1	1	1	1	1	1	1	1	1	1	1	1	4	1	1	4	1	1	2	1	1	2	3	2	3	2	3	1	1	1	1	1	2	2	2
0	1	3	1	1	1	1	1	2	1	1	1	1	1	1	1	1	1	1	2	1	1	1	1	4	1	1	4	3	2	1	1	1	2	2	4	2	3	2	2	1	1	2	2	2	1
0	2	3	1	1	1	1	1	2	1	1	1	1	1	2	1	1	1	1	1	1	4	1	1	4	1	1	1	1	2	1	1	1	1	2	4	1	3	2	2	1	1	2	2	2	1
0	1	1	1	1	2	1	1	1	1	2	2	1	1	2	1	1	1	1	1	1	1	1	3	1	1	3	1	1	3	1	1	1	2	1	2	2	3	1	2	1	1	2	2	2	1
0	1	1	1	1	1	1	1	1	1	1	1	1	1	1	1	1	1	1	3	2	2	3	3	2	3	2	2	2	3	1	1	2	2	2	1	2	1	1	2	2	2	1	2	1	2
0	1	1	1	1	1	1	1	1	1	1	1	1	2	1	2	1	1	1	2	1	1	1	4	1	1	4	1	1	2	1	1	1	2	2	3	2	3	1	2	1	2	2	2	1	2
0	2	1	1	1	1	1	1	1	1	1	1	1	1	1	1	1	1	1	3	1	2	1	3	1	2	3	1	1	2	1	1	2	1	2	1	2	2	1	2	1	1	2	2	2	1
0	2	2	1	1	1	1	1	1	1	1	1	1	1	1	1	1	1	1	2	1	1	2	4	1	2	4	1	1	3	1	1	1	2	2	1	1	1	1	1	1	1	2	2	2	1
0	2	2	1	1	1	1	1	1	1	2	1	1	1	1	1	1	1	1	3	1	1	1	4	1	4	4	1	1	3	1	1	1	2	2	4	2	3	1	1	1	1	1	2	2	1
0	1	2	1	1	1	1	1	1	1	1	1	1	1	1	1	1	1	1	1	1	1	1	4	1	1	4	1	1	1	1	1	1	1	2	1	1	3	1	2	1	2	2	2	2	2
0	2	1	1	1	1	1	1	1	1	1	1	1	2	1	1	1	1	1	1	2	2	4	1	1	4	1	1	1	2	1	1	2	2	2	1	2	1	1	2	2	1	2	2	1	2
0	2	3	1	1	1	1	1	1	1	1	1	1	1	2	1	1	1	1	1	1	1	1	1	1	1	1	1	1	2	1	1	1	2	2	1	2	1	1	2	2	1	2	2	2	1
0	2	1	1	1	1	1	1	2	1	2	1	1	1	2	1	1	1	1	1	1	1	1	4	1	1	4	1	1	1	1	1	1	2	2	1	2	2	1	2	2	2	2	1	2	2
0	2	4	2	1	1	1	1	1	1	1	1	1	1	1	1	1	1	1	3	1	4	3	2	4	3	2	3	4	1	1	1	1	2	1	1	2	1	1	2	1	1	1	2	2	1
0	2	1	1	1	1	1	1	1	1	1	1	1	1	1	2	1	1	1	1	2	4	4	1	4	3	3	1	1	1	1	1	1	2	2	1	1	1	2	1	2	0	1	1	2	1
0	2	1	1	1	1	1	1	1	1	1	1	1	1	1	1	1	1	1	4	3	3	4	3	1	4	3	4	3	1	1	2	1	2	2	1	2	1	1	1	1	1	2	2	1	1
0	2	2	1	1	1	1	1	1	1	1	1	1	1	1	1	1	1	1	3	2	2	1	2	1	4	2	3	2	3	1	1	1	1	1	1	2	1	1	2	1	1	2	2	1	1
0	1	2	1	1	1	2	1	1	1	1	1	1	1	1	1	1	1	1	1	2	1	1	4	2	3	4	2	1	2	1	1	1	2	2	1	2	1	1	1	1	1	1	2	1	2
0	1	1	1	1	1	1	1	1	1	1	1	1	1	1	1	1	1	1	2	2	3	3	4	2	3	3	3	1	1	1	1	1	2	2	1	2	1	1	1	1	1	2	2	1	1
0	2	1	1	1	1	1	1	1	1	1	1	1	1	1	1	1	1	1	2	1	1	1	4	1	2	4	1	1	3	1	1	1	2	1	1	2	1	1	2	1	1	1	2	1	1
0	2	2	1	1	1	1	1	1	1	1	1	2	1	1	1	1	2	1	1	1	1	1	4	1	3	4	1	1	1	1	1	1	2	2	1	1	1	1	1	1	1	1	2	1	1
0	2	2	1	1	1	1	1	1	1	1	1	1	1	1	1	1	1	1	1	1	1	1	1	1	1	4	1	1	2	1	1	1	2	1	1	2	1	1	1	1	1	2	2	1	1
0	1	1	1	1	1	1	1	2	1	1	1	1	1	1	1	1	1	1	1	2	2	1	1	2	1	4	1	1	2	1	1	1	2	2	1	2	1	1	1	1	1	2	2	1	1
0	2	1	1	1	1	1	1	2	1	1	1	1	1	1	1	1	1	1	1	1	1	1	1	1	1	4	1	4	1	1	1	2	1	1	1	2	1	2	2	2	1	2	2	1	1
0	1	2	1	1	2	1	1	1	1	1	1	1	1	1	2	1	1	1	2	2	1	2	2	2	2	4	2	1	1	1	2	2	2	2	1	1	1	1	1	1	1	1	2	1	1
0	2	1	1	1	1	1	1	1	1	1	1	2	1	2	1	1	2	2	1	1	1	2	4	1	3	4	1	1	1	1	1	1	1	2	1	1	1	1	1	2	2	2	2	1	2
0	1	1	1	1	1	1	1	1	1	1	1	1	2	1	1	1	1	1	1	4	3	3	1	1	3	3	3	3	2	1	2	2	3	1	1	1	1	1	2	1	1	2	2	1	2
0	1	2	1	2	1	1	1	2	1	1	1	2	1	2	2	1	1	1	1	1	1	2	2	2	2	1	2	3	1	1	2	1	2	1	1	2	1	2	2	1	1	2	2	1	2
0	2	1	1	1	1	1	1	2	1	1	1	1	2	1	1	1	1	1	1	2	3	1	4	1	1	4	1	1	2	1	1	1	1	1	1	2	2	1	2	2	1	2	2	2	2
0	1	1	1	1	1	1	1	1	1	2	1	2	1	1	1	1	1	1	3	3	3	3	3	3	3	3	1	3	1	1	1	1	1	2	3	2	3	2	1	1	1	1	2	1	1
0	1	1	2	1	2	1	1	2	1	1	1	1	1	1	1	1	1	1	2	3	1	1	4	1	3	4	2	1	2	1	2	2	1	1	1	2	1	1	2	1	0	1	2	1	1
0	2	1	1	1	1	1	1	1	1	1	1	1	1	1	1	1	1	1	1	1	1	3	4	1	2	4	1	1	2	1	1	1	2	1	1	2	3	2	1	1	1	2	2	1	2
0	1	2	1	1	1	1	1	1	1	1	1	1	1	1	1	1	1	1	1	1	1	1	4	1	2	4	1	1	2	1	1	2	1	2	1	2	1	1	2	1	2	2	2	2	2
0	1	2	1	1	1	1	1	1	1	1	1	1	1	1	1	1	1	1	2	2	3	4	1	1	2	2	1	1	3	1	1	1	2	1	1	2	1	2	1	1	1	1	2	2	2
0	1	2	1	1	1	1	1	1	1	1	1	1	1	1	1	1	1	1	1	1	1	1	1	1	1	1	1	1	2	1	1	1	3	1	2	1	1	1	2	1	1	2	2	1	1
0	2	2	1	1	1	1	1	2	1	1	1	1	1	1	1	1	1	1	3	3	1	1	4	1	1	4	1	1	3	1	1	2	2	1	1	2	1	1	2	1	1	2	2	2	2
1	2	2	1	1	1	1	1	1	1	1	1	1	1	1	1	1	1	1	1	1	1	1	1	1	4	4	1	1	3	1	1	2	3	1	1	2	1	1	1	1	1	2	2	2	2
0	2	1	1	1	1	1	1	1	1	1	1	2	1	1	1	1	1	1	1	1	1	1	4	1	1	4	1	1	3	1	1	2	2	1	1	2	1	1	2	1	1	2	2	1	1
0	1	1	1	1	1	1	1	1	1	1	1	1	1	1	1	1	1	1	1	1	1	1	1	1	1	4	1	1	3	1	1	1	3	2	2	2	1	1	1	1	1	2	2	1	1
0	2	4	1	1	1	1	1	1	1	2	1	1	1	1	1	1	1	1	1	1	2	1	4	1	2	4	1	1	2	1	1	1	1	1	1	1	1	2	2	1	1	2	2	2	1
0	2	1	1	1	1	1	1	1	1	1	1	1	1	1	1	1	1	1	1	1	1	1	4	1	1	4	1	1	3	1	1	1	2	1	1	2	2	1	1	2	2	2	2	2	2
0	1	1	1	1	1	1	1	1	1	1	1	1	1	1	1	1	1	1	3	1	1	1	4	1	4	4	1	1	2	1	1	1	2	1	1	2	1	1	1	1	1	2	2	1	1
0	2	1	1	2	1	1	1	1	1	1	1	1	1	2	1	1	1	1	1	1	1	1	4	1	1	4	1	1	1	1	2	2	2	2	1	2	1	2	2	1	1	2	2	2	2
0	2	2	1	1	1	1	1	1	2	1	1	1	1	1	1	1	1	1	3	1	2	1	4	1	1	4	1	1	2	1	1	1	2	2	1	2	1	1	1	2	1	1	2	2	1
0	2	1	1	1	1	1	1	1	1	1	1	1	1	1	1	1	1	1	1	1	1	1	1	1	4	4	1	1	3	1	1	1	2	2	1	2	3	1	2	1	2	2	2	2	2
0	2	2	1	1	1	1	1	1	2	2	1	1	1	1	1	1	1	1	3	3	3	3	1	1	1	4	1	1	2	1	1	2	2	2	2	2	3	1	2	2	2	2	2	1	2
0	1	1	1	1	1	1	1	1	1	1	1	1	1	1	1	1	1	2	4	1	4	4	4	1	1	1	4	2	2	1	1	1	1	2	1	2	3	2	2	1	1	2	2	1	1
0	1	3	1	1	1	1	1	1	1	1	1	1	1	1	1	1	1	1	1	1	1	1	4	1	1	4	1	1	3	1	1	1	3	2	1	2	3	1	1	1	1	2	2	1	2
0	1	2	1	1	1	1	1	1	1	1	1	1	1	1	1	1	1	1	3	1	1	1	4	1	1	4	1	1	3	1	1	1	1	2	1	2	1	1	1	1	1	2	2	1	1
0	2	2	1	1	1	1	1	1	1	1	1	1	1	1	1	1	1	1	1	1	1	1	1	1	4	4	1	1	1	1	1	1	2	1	1	2	1	1	1	1	1	1	2	2	1
0	1	1	1	1	1	1	1	1	1	1	1	1	1	1	1	1	1	1	1	1	1	1	1	1	1	2	1	1	2	1	1	1	3	2	3	2	1	1	1	1	1	1	2	2	1
0	2	3	1	1	1	1	1	1	1	1	1	1	1	1	2	1	1	1	1	1	1	1	4	1	1	4	1	1	1	1	2	2	2	2	1	2	1	1	2	1	1	2	2	2	1
0	1	2	1	1	1	1	1	1	1	1	1	1	1	1	1	1	1	1	3	4	1	1	4	1	1	4	1	1	2	1	1	2	1	2	3	2	1	1	1	1	1	2	2	2	1
0	1	1	1	1	1	1	1	1	1	1	1	1	1	1	1	1	1	1	1	1	1	1	4	1	1	4	1	1	1	1	1	2	1	2	2	2	1	1	2	1	1	2	2	2	1
0	1	2	1	1	1	2	1	1	1	1	1	1	1	2	1	1	1	1	3	1	3	1	4	1	2	4	1	1	2	1	1	1	2	2	3	2	1	2	2	1	1	2	2	2	1
0	1	2	1	1	1	1	1	1	1	1	1	1	1	1	1	1	1	1	2	3	2	3	4	1	2	2	1	1	2	1	1	1	2	1	1	2	3	1	2	1	1	2	2	2	1
0	2	1	1	1	1	1	1	1	1	1	1	2	1	1	1	2	1	1	2	2	2	2	4	2	2	4	1	1	2	1	1	1	1	1	2	2	2	2	2	1	1	2	2	2	1
0	2	1	1	1	1	1	1	1	1	1	1	1	2	1	1	1	1	1	1	2	1	3	4	1	2	4	1	1	2	1	1	2	2	2	1	2	3	1	2	1	1	2	2	2	2
0	2	2	1	1	1	1	1	1	1	1	1	1	1	1	1	1	1	1	1	2	1	1	4	1	1	4	1	1	3	1	1	1	3	2	1	2	3	1	2	1	2	2	2	1	2
0	1	1	1	1	1	1	1	1	1	1	1	1	1	1	1	1	1	1	4	2	3	4	2	4	3	2	2	4	2	1	1	1	2	2	2	2	3	1	2	2	0	1	2	1	1
0	2	1	1	1	1	1	1	2	1	1	1	1	1	1	1	1	1	1	3	3	2	3	2	1	3	4	1	1	2	1	2	2	2	2	1	2	1	1	1	2	1	2	2	1	2
0	2	1	1	1	1	1	1	1	1	1	1	1	1	1	1	1	1	1	2	2	1	1	4	1	4	4	1	1	1	1	1	1	3	2	1	2	1	1	1	1	1	1	2	1	1
0	1	3	1	1	1	1	1	1	1	1	1	1	1	1	1	1	1	1	1	1	1	3	4	1	1	4	1	1	2	1	1	1	3	2	1	1	1	1	2	1	1	1	2	1	1
0	1	1	1	1	1	1	1	1	1	1	1	1	1	1	1	1	1	1	4	2	3	3	3	2	2	4	1	4	3	1	1	2	2	2	1	2	1	1	1	2	0	1	2	1	1
0	1	2	1	1	1	1	1	1	1	1	1	1	1	1	1	1	1	1	3	1	4	1	1	2	1	3	1	1	2	1	1	1	2	1	1	2	1	1	1	1	1	2	2	1	1
0	2	1	2	1	1	1	1	1	1	1	1	1	1	1	1	1	1	1	1	2	1	1	3	1	1	4	1	1	1	1	1	2	2	1	2	2	1	1	1	1	1	1	2	2	1
0	2	1	1	1	1	1	1	1	2	1	1	1	1	1	1	1	1	1	1	2	2	2	3	1	2	3	1	1	2	1	1	1	2	2	1	2	1	1	1	2	1	2	2	1	1
0	1	2	1	1	1	1	1	2	1	1	1	1	1	1	1	1	1	1	1	1	1	1	4	1	1	4	1	1	1	1	1	1	1	2	2	2	1	1	2	1	2	2	2	2	2
0	2	1	1	1	2	1	1	2	1	2	2	1	1	1	1	2	1	1	1	1	1	1	1	1	1	4	1	1	1	1	1	1	1	2	1	2	1	1	1	1	1	2	2	1	2
0	1	2	1	1	1	1	1	1	1	1	1	1	1	1	1	1	1	1	1	3	1	1	1	1	4	1	1	1	2	1	1	2	2	1	1	2	1	1	2	2	1	2	2	1	1
0	2	1	1	1	1	1	1	1	1	1	1	1	1	1	1	1	1	1	1	1	1	1	1	1	1	4	1	1	3	1	1	2	3	1	1	2	1	1	2	1	1	1	2	2	1
0	1	1	1	1	1	1	1	1	1	1	1	1	1	1	1	1	1	1	2	2	2	2	3	1	4	4	1	1	3	1	1	1	3	2	2	2	1	1	2	1	1	2	2	2	2
0	2	1	1	1	1	1	1	1	1	1	1	1	1	1	1	1	1	1	1	1	1	1	1	1	2	1	1	1	1	1	1	1	2	2	1	2	1	1	2	1	2	2	2	2	2
0	2	2	1	1	1	1	1	2	1	1	1	1	1	1	1	1	1	1	2	2	1	1	4	1	1	4	2	1	3	1	1	2	2	1	1	2	1	1	2	1	1	2	2	2	2
0	2	2	1	1	1	1	1	1	1	1	1	1	1	1	1	1	1	1	2	2	1	1	4	1	1	4	1	1	3	1	1	1	2	1	1	2	1	1	2	1	1	1	2	2	1
0	1	1	1	1	1	1	1	1	1	1	1	1	1	1	1	1	1	1	1	1	1	1	4	1	2	4	2	1	3	1	2	2	2	2	1	2	1	1	2	2	1	2	2	2	1
0	1	1	1	1	1	1	1	1	1	1	1	1	1	1	1	2	1	1	1	1	2	2	4	1	3	3	3	1	2	1	2	1	1	2	1	2	1	1	2	1	1	2	2	1	1
0	2	1	1	1	1	1	1	1	1	1	1	1	1	1	1	1	1	1	2	1	2	2	3	1	1	2	2	2	3	1	1	1	2	2	1	2	1	1	2	1	0	1	2	2	1
0	2	1	1	1	1	1	1	1	1	1	1	1	1	1	1	1	1	1	1	1	1	1	1	1	1	1	1	1	3	1	1	2	2	2	1	2	3	2	2	1	1	2	2	1	1
0	1	1	1	1	1	1	1	1	1	1	1	1	1	1	1	1	1	1	1	1	1	1	1	1	1	4	1	1	3	1	1	2	2	2	1	2	3	1	1	1	1	2	2	2	1
0	1	2	1	1	1	1	1	2	1	2	1	1	1	1	1	1	1	1	1	2	2	2	4	1	1	3	1	2	2	1	1	1	2	2	1	2	1	1	2	1	1	2	2	1	2
0	2	1	1	1	1	1	1	1	1	1	1	1	1	1	1	1	1	1	1	2	1	1	4	1	4	4	1	1	3	1	1	1	2	2	1	2	2	2	2	2	1	2	2	1	1
0	2	2	1	1	1	1	1	1	1	1	1	1	1	1	1	1	1	1	1	3	1	3	1	1	1	4	1	1	2	1	1	2	2	2	1	2	3	1	2	1	1	2	2	1	1
0	1	2	1	1	1	1	1	1	1	1	1	2	1	1	1	1	1	1	2	2	2	4	2	1	3	4	3	1	2	1	1	1	2	2	3	2	2	2	2	1	1	2	2	1	1
0	2	1	1	1	1	1	1	1	1	1	1	1	1	1	1	1	2	1	3	4	4	3	1	1	3	2	3	3	2	1	1	1	2	1	1	2	1	1	2	1	1	1	2	1	1
0	2	1	1	1	1	1	1	1	1	1	1	2	1	1	1	1	1	1	3	3	3	4	3	1	3	4	4	1	1	1	1	1	1	1	3	2	1	2	2	1	1	2	2	1	2
0	2	1	1	1	1	1	1	1	1	1	1	1	1	1	1	1	1	1	2	1	1	1	1	1	1	4	1	1	2	1	1	1	1	1	1	2	1	1	1	1	1	1	2	1	1
0	1	2	1	1	1	1	1	1	1	1	1	1	2	1	1	1	1	1	1	1	1	1	4	1	1	4	1	1	3	1	1	1	3	2	1	2	1	1	2	1	1	2	2	1	2
0	2	1	1	1	1	1	1	1	1	1	1	1	1	1	1	1	1	1	4	1	1	1	4	1	1	4	1	1	2	1	1	2	2	2	1	1	1	1	1	1	1	2	2	2	2
0	1	1	1	1	1	1	1	1	1	1	1	1	1	1	1	1	1	1	3	2	2	2	1	1	1	2	2	1	2	1	1	2	1	2	1	1	1	1	1	1	2	1	2	1	2
0	1	2	1	1	2	1	1	2	1	1	1	2	1	1	1	1	1	1	2	1	1	1	2	1	2	2	1	1	1	1	2	1	2	1	1	2	1	1	2	1	1	2	2	1	1
0	2	2	1	1	1	2	2	1	1	1	1	1	1	1	1	1	1	1	2	1	3	2	4	1	1	4	2	1	1	1	1	1	3	2	1	2	1	1	1	1	1	2	1	2	2
0	1	2	1	1	1	1	1	1	1	1	1	1	1	1	1	1	1	1	1	2	1	4	1	1	1	3	1	1	1	1	1	1	2	1	1	1	1	2	1	1	1	1	2	1	1
0	1	1	1	1	1	1	1	1	1	1	1	1	1	1	1	1	1	1	1	1	1	2	1	1	1	4	1	1	1	1	1	1	1	2	2	2	1	1	1	1	1	1	2	1	1
0	2	1	1	1	1	1	1	1	1	1	1	1	1	1	1	1	1	1	2	2	2	4	1	2	2	2	2	1	2	1	1	2	2	1	1	2	1	1	2	1	1	1	2	1	1
0	2	1	1	1	1	1	1	1	1	1	2	1	1	1	1	1	1	1	1	2	1	1	1	1	1	4	1	1	2	1	1	2	2	1	1	2	1	1	2	1	1	2	2	2	1
0	2	3	1	1	1	1	1	1	1	1	1	1	1	1	1	1	1	1	3	2	1	3	2	1	1	4	1	1	3	1	1	1	3	2	1	2	1	1	2	1	0	1	2	1	1
0	1	1	1	1	1	1	1	1	1	1	1	1	1	1	1	1	2	1	1	4	2	4	4	1	4	4	1	1	1	1	1	1	2	2	1	2	1	1	1	1	1	2	2	1	1
0	1	1	1	1	1	1	1	1	1	2	1	1	1	1	1	1	1	1	1	2	1	4	1	1	2	3	1	1	3	1	2	2	2	1	1	2	1	1	2	1	1	2	2	2	1
0	2	1	1	1	1	1	1	1	1	1	1	1	1	1	1	1	1	1	1	2	1	2	4	1	1	4	1	1	3	1	1	1	2	2	1	2	1	2	1	1	1	2	2	2	1
0	2	2	1	1	1	1	1	2	1	1	1	1	1	1	1	1	1	1	1	1	1	4	1	1	1	1	1	4	1	1	1	1	1	1	1	2	1	1	1	1	1	1	2	1	1
0	1	2	1	1	1	1	1	1	1	1	1	1	1	1	1	1	1	1	1	1	1	1	3	1	1	3	2	1	2	1	1	2	1	2	1	2	1	1	2	1	0	1	2	1	1
0	1	1	1	1	1	1	1	2	1	1	1	1	1	1	1	1	1	1	1	1	1	4	4	1	1	4	1	1	3	1	1	1	1	1	1	2	1	1	2	1	1	2	2	1	1
0	1	2	1	1	1	1	1	1	1	1	1	1	1	1	1	1	1	1	1	1	1	1	1	1	1	1	1	1	2	1	1	1	2	1	1	2	1	1	1	2	1	1	2	1	2
0	2	1	1	1	1	1	1	1	1	1	1	1	1	2	2	1	1	1	1	1	1	2	4	1	1	4	1	1	2	1	2	2	1	2	1	2	1	1	2	1	1	2	2	2	1
0	2	1	1	1	1	1	1	1	1	1	1	1	1	1	1	1	1	1	1	2	2	1	1	1	1	4	1	1	1	1	1	1	1	2	1	1	1	1	2	1	1	2	1	1	2
1	2	2	1	1	1	1	1	2	1	1	1	2	1	2	1	1	1	1	1	1	1	3	1	1	1	4	1	1	1	1	2	1	2	1	1	2	1	1	2	1	1	2	2	2	1
0	2	1	1	1	1	1	1	1	1	2	1	1	1	1	1	1	1	1	2	2	2	2	4	2	2	4	2	1	3	1	1	1	3	2	1	1	1	1	2	2	1	2	2	2	2
0	1	2	1	1	1	1	1	1	1	1	1	1	1	1	1	1	1	1	1	1	1	1	1	1	1	4	1	1	1	1	1	2	1	2	1	2	1	1	1	1	1	2	2	1	1
0	2	2	1	1	1	1	1	1	1	1	1	1	1	1	1	1	1	1	1	1	1	1	1	1	1	3	1	1	3	1	1	1	2	1	1	2	1	1	1	1	1	1	2	1	1
0	2	1	1	1	1	1	1	1	1	1	1	1	1	1	1	1	1	1	4	4	4	1	2	1	4	1	4	4	1	1	1	1	1	2	1	1	1	1	1	1	1	1	2	1	2
0	1	1	1	1	1	1	1	1	1	1	1	1	1	1	1	1	1	1	1	1	1	1	4	1	1	4	1	1	2	1	1	2	1	2	2	2	3	1	1	1	2	1	2	1	2
1	1	1	1	1	1	1	1	1	1	1	1	1	1	1	1	1	1	1	2	1	3	1	1	1	1	2	1	1	2	1	1	1	2	1	2	2	3	1	2	2	1	2	2	2	1
0	1	1	1	1	1	1	1	2	1	1	1	1	1	1	1	1	1	1	2	2	1	2	2	2	2	3	2	2	1	1	1	2	2	1	2	2	1	1	1	1	1	2	2	2	1
0	1	1	1	1	1	1	1	1	1	1	1	1	1	1	1	1	2	1	2	3	2	4	3	2	2	3	2	2	2	1	1	1	1	2	3	2	1	1	1	1	1	2	2	1	1
0	1	1	1	1	1	1	1	1	1	1	1	1	1	1	1	1	1	1	2	4	4	4	3	3	1	2	1	1	1	1	1	1	1	1	2	2	1	1	1	2	1	1	2	1	1
0	2	1	1	1	1	1	1	1	1	1	1	1	1	1	1	1	2	1	1	2	2	2	4	1	1	4	1	1	1	1	1	1	2	1	1	2	3	1	1	2	2	2	2	1	2
0	2	1	1	1	1	1	1	2	1	1	1	1	1	1	1	1	1	1	1	2	2	1	4	1	1	4	1	1	1	1	1	1	1	2	1	2	1	2	2	2	2	2	2	1	2
0	2	1	1	1	1	1	1	2	1	1	1	1	1	1	1	1	1	1	1	1	3	2	4	2	2	4	2	2	1	1	1	2	1	2	1	2	1	1	2	1	1	2	2	1	1
0	1	1	1	1	1	2	1	1	1	1	1	1	1	1	1	1	2	1	1	1	1	1	1	1	1	1	1	1	1	1	1	1	2	1	2	2	1	1	1	1	1	1	2	1	1
1	2	3	1	1	1	1	1	1	1	1	1	1	1	1	1	1	2	1	1	1	1	1	4	1	1	4	1	1	1	1	1	1	3	1	1	1	1	1	2	1	1	2	2	1	2
1	1	3	1	1	1	1	1	1	1	1	1	1	1	1	1	1	1	1	3	3	3	1	2	1	2	4	2	3	1	1	1	1	2	2	1	2	1	1	1	1	2	2	2	1	2
0	1	1	1	1	1	1	1	1	1	1	1	1	1	1	1	1	1	1	3	1	3	4	3	1	3	1	1	1	2	1	1	1	3	2	1	2	1	1	1	1	1	2	2	1	1
0	1	1	1	1	1	1	1	1	1	1	1	1	1	1	1	1	1	1	1	3	4	1	4	1	3	4	1	3	2	1	1	2	2	2	1	2	1	1	1	1	1	2	2	1	1
0	1	1	1	1	1	1	1	1	1	1	1	1	1	1	1	1	1	1	1	1	1	1	4	1	2	4	1	1	2	1	1	1	1	1	1	2	1	1	2	1	1	2	2	2	1
0	1	2	1	1	1	1	1	1	1	1	1	1	1	1	1	1	1	1	3	3	3	3	4	1	1	4	1	1	2	1	1	1	1	2	1	2	1	1	2	1	1	2	2	1	2
0	2	1	1	1	1	1	1	2	1	1	1	1	1	1	1	1	1	1	2	3	1	4	4	1	3	3	1	1	1	1	1	1	2	2	1	2	1	1	1	1	1	2	2	1	1
0	1	1	1	1	1	1	1	2	1	2	2	1	1	1	1	1	1	1	2	2	1	1	4	2	1	4	1	1	3	1	1	1	2	2	2	2	1	1	1	1	2	1	2	1	2
0	2	1	1	1	1	1	1	1	1	1	1	1	1	1	1	1	1	1	1	1	1	1	1	1	1	4	1	1	2	1	1	1	1	2	1	2	2	1	2	1	1	2	2	1	1
0	1	2	1	1	1	1	1	1	1	1	1	1	1	1	1	1	1	1	1	3	2	1	4	1	2	4	1	1	2	1	1	1	3	2	1	2	3	1	1	1	1	1	2	2	1
0	2	1	1	1	1	1	1	1	1	1	1	2	1	1	1	1	1	1	1	3	1	1	3	1	1	4	1	3	3	1	1	1	2	1	1	2	2	2	1	1	0	2	2	2	1
0	1	2	1	1	2	1	1	2	1	1	1	2	1	1	1	2	1	1	2	1	3	3	3	3	4	3	1	1	2	1	2	1	3	2	1	1	3	1	2	1	1	2	2	2	2
0	1	1	1	1	1	1	1	1	1	1	1	1	1	1	1	1	1	1	2	1	1	1	4	1	1	4	1	1	2	1	1	1	2	2	1	2	2	1	2	2	2	1	2	1	2
0	2	1	1	1	1	1	1	2	2	1	1	1	1	1	1	1	1	1	1	1	4	4	1	1	3	1	1	1	2	1	1	1	1	1	2	1	2	2	1	1	0	2	2	1	1
0	1	2	1	1	1	1	1	1	1	1	1	1	1	1	1	1	1	1	1	1	1	1	2	1	1	3	1	1	1	1	1	1	1	2	1	1	3	1	1	1	2	1	2	1	2
0	2	4	1	1	2	2	1	1	1	1	1	1	1	2	2	2	1	1	1	1	1	4	1	1	1	4	1	1	1	1	1	1	2	1	1	1	3	1	2	1	0	2	2	1	1
0	1	1	1	2	1	1	1	1	1	1	1	1	1	1	1	1	1	1	1	1	1	1	4	1	3	4	1	1	1	1	1	1	2	1	1	2	3	1	2	1	1	2	2	1	2
0	2	1	1	1	1	1	1	1	1	1	1	1	1	1	1	1	2	1	2	2	2	2	2	1	2	4	1	1	3	1	1	1	2	2	1	2	3	2	1	2	0	2	1	2	1
0	1	1	1	1	2	2	1	1	1	1	1	1	1	1	1	2	1	1	4	4	4	4	2	4	4	1	3	2	1	1	2	1	2	2	2	2	1	2	2	1	1	2	2	1	1
0	2	1	1	1	1	1	1	1	1	1	1	1	1	2	1	1	1	1	3	1	1	1	1	1	4	1	1	1	1	1	1	1	3	1	1	1	3	2	1	1	1	2	2	1	1
0	2	1	1	1	1	1	1	1	1	1	1	1	1	1	1	1	1	1	1	1	1	1	1	1	2	2	1	1	2	1	1	1	2	2	1	2	1	1	2	1	2	2	2	1	2
0	1	2	1	1	1	1	1	1	1	1	1	1	1	1	1	1	1	1	1	1	2	2	1	1	1	4	1	1	2	1	1	1	2	1	2	2	1	1	2	1	0	2	2	1	1
0	1	1	1	2	1	1	1	1	1	1	1	2	2	1	1	1	1	2	4	3	4	1	3	1	4	3	2	1	1	1	1	2	3	2	1	2	1	1	2	2	2	2	2	1	2
0	2	2	1	1	1	1	1	2	1	1	1	1	1	1	1	1	1	1	1	1	1	1	4	1	1	4	1	1	2	1	1	1	2	2	1	2	3	1	2	2	0	2	2	1	1
0	1	3	1	1	1	1	1	1	1	1	1	1	1	1	1	1	1	1	1	1	1	4	4	1	4	4	1	1	3	1	1	2	2	1	1	1	1	2	2	2	0	2	2	1	1
0	1	2	1	1	1	1	1	1	1	1	1	1	1	1	1	1	1	1	1	1	1	1	4	1	4	4	1	1	3	1	1	1	3	2	1	2	1	1	1	1	1	1	2	1	1
0	1	1	1	1	1	1	1	1	1	1	1	1	1	1	1	1	1	1	1	1	2	1	3	1	1	4	1	1	2	1	2	2	2	2	1	2	2	1	1	1	0	2	2	2	1
0	1	1	1	1	1	1	1	1	2	1	1	1	1	1	1	1	1	1	2	2	2	1	3	2	2	4	2	1	3	1	1	2	2	2	1	2	1	1	2	2	0	2	2	2	1
0	1	1	1	1	1	1	1	1	1	1	1	1	1	1	1	1	1	1	1	1	1	1	3	1	1	4	1	1	3	1	1	2	2	2	1	2	1	1	2	2	2	2	2	2	2
0	2	1	1	1	1	1	1	1	1	1	1	1	1	1	1	1	1	1	1	1	1	2	4	1	1	4	1	1	3	1	1	2	2	2	1	2	1	1	2	2	0	2	2	2	1
0	1	3	1	1	1	1	1	1	1	1	1	1	1	1	1	1	1	1	1	1	1	1	4	1	3	4	1	1	3	1	1	1	1	2	2	1	1	1	1	1	1	1	2	2	1
0	1	2	1	1	1	1	1	1	1	1	1	1	1	1	1	1	1	1	1	4	1	3	4	1	1	4	1	1	3	1	1	2	1	2	3	2	2	1	2	2	0	2	2	1	1
0	2	1	1	1	2	2	1	1	2	2	1	1	1	1	1	1	1	1	1	1	2	1	1	2	1	4	1	1	1	1	1	1	3	2	3	2	3	1	1	1	1	2	2	1	1
0	2	3	2	2	2	1	2	1	2	1	1	1	1	1	1	2	1	1	4	1	4	2	4	2	4	3	1	2	1	2	1	2	1	1	1	1	3	1	2	2	0	2	2	1	1
0	2	3	1	1	1	1	1	1	1	2	1	1	1	1	1	1	1	1	4	3	3	4	4	3	4	2	4	4	2	1	1	1	1	2	1	1	1	1	2	1	1	2	2	1	1
0	1	2	1	1	1	1	1	1	1	1	1	1	1	1	1	1	1	1	2	1	2	3	4	1	1	4	1	1	3	1	1	2	2	2	1	2	1	1	1	1	1	1	2	1	1
0	2	2	2	1	1	1	1	1	1	1	1	1	1	1	1	1	1	1	4	4	4	4	3	4	4	1	4	4	1	1	1	1	2	2	1	1	1	1	1	1	1	2	2	1	1
0	1	1	1	1	1	1	1	1	1	1	1	1	1	1	1	1	1	1	3	3	4	3	4	2	1	4	1	1	2	1	1	1	1	2	1	2	3	1	1	1	0	2	2	1	1
0	1	2	1	1	1	2	1	1	2	2	1	1	1	1	2	1	1	1	3	4	2	1	4	3	1	3	2	3	3	1	1	1	2	2	2	2	1	1	1	1	1	2	2	1	1
0	2	2	1	1	2	1	1	1	1	1	1	1	1	2	1	1	1	1	1	2	1	1	4	1	1	4	1	1	1	1	1	1	2	2	1	2	1	1	1	1	0	2	2	1	1
0	1	3	1	1	1	1	1	1	1	1	1	1	1	1	1	1	1	1	2	2	2	1	2	2	3	2	3	3	3	1	1	1	2	1	2	2	1	1	2	2	0	2	2	1	1
0	2	1	1	1	1	1	1	1	1	1	1	1	1	1	1	1	1	1	1	4	4	3	4	1	2	3	1	2	3	1	1	2	2	1	3	2	3	2	2	2	0	2	2	1	1
0	2	2	1	1	1	1	1	1	1	1	1	1	1	1	1	1	2	1	2	1	2	4	2	3	4	2	2	4	1	1	1	1	3	2	1	2	1	1	1	1	1	2	2	2	1
0	2	1	1	1	1	1	1	2	1	2	1	1	1	1	1	1	2	1	1	4	4	1	1	3	4	2	4	1	2	1	1	2	2	2	1	1	1	2	2	2	0	2	2	1	1
0	1	1	1	1	1	1	1	1	1	1	1	1	1	1	1	1	1	1	1	1	1	1	2	1	1	1	1	1	3	1	1	2	1	1	3	2	1	2	2	1	0	2	2	2	1
0	1	1	1	1	1	1	1	1	1	1	1	1	1	1	1	1	1	1	1	2	2	2	2	1	1	4	1	1	1	1	1	1	2	2	3	2	1	1	1	2	1	2	2	2	1
0	1	1	1	1	1	1	1	1	1	1	1	1	1	1	1	1	1	1	2	2	2	2	2	2	2	2	2	2	3	1	1	1	2	1	3	2	3	1	1	2	0	2	2	1	1
0	2	1	1	1	1	1	1	1	1	1	1	1	2	2	1	2	1	1	1	1	1	1	4	1	1	4	3	1	2	1	1	2	2	2	1	2	1	2	1	1	1	2	2	1	1
0	2	1	1	1	1	1	1	1	1	1	1	1	1	1	1	1	1	1	2	1	2	4	3	1	1	2	2	2	2	1	1	1	1	1	1	2	1	2	1	1	1	1	2	1	1
0	2	1	1	1	1	1	1	1	1	1	1	1	1	1	1	1	1	1	1	2	3	3	4	1	2	1	3	4	2	1	1	1	3	1	1	2	1	2	1	1	1	2	2	1	1
0	2	1	1	1	1	1	1	1	1	1	1	1	1	1	1	1	1	1	4	3	2	4	1	3	1	1	2	1	2	1	1	2	2	2	1	2	1	1	1	2	0	2	1	2	1
0	2	1	1	1	1	1	1	1	1	1	1	1	1	1	1	1	1	1	2	3	2	3	2	2	3	2	1	1	2	1	1	1	2	2	1	2	1	1	2	1	2	2	2	1	2
0	2	2	1	1	1	1	1	1	1	1	1	1	1	1	1	1	1	1	2	1	1	1	4	1	2	1	1	1	1	1	1	2	2	1	1	1	1	1	2	2	2	2	2	1	2
0	1	1	1	1	1	1	1	1	1	1	1	1	1	1	1	1	1	1	1	4	3	4	3	1	3	3	1	3	1	1	1	2	1	1	1	2	1	1	2	1	1	2	2	1	1
0	1	1	1	1	2	1	1	1	1	1	1	1	1	1	1	2	1	1	3	1	1	1	1	1	1	1	2	3	2	1	1	1	3	1	1	2	2	1	2	1	0	2	2	1	1
0	1	2	1	1	1	2	1	2	1	1	1	1	1	1	1	1	1	1	1	1	1	1	1	1	1	4	1	1	2	1	1	1	2	1	2	1	1	2	1	1	1	1	1	2	1
0	1	2	1	2	1	2	1	1	1	1	1	1	1	1	1	1	1	1	1	1	1	1	2	1	2	1	1	1	2	1	1	1	2	2	1	2	1	1	1	1	1	2	2	1	1
0	2	1	1	1	1	1	1	2	1	1	1	1	1	1	1	1	1	1	1	2	1	2	4	1	1	4	1	1	2	1	1	2	2	1	1	2	1	1	2	1	0	2	2	1	1
0	1	1	1	1	1	1	1	1	1	1	1	1	1	1	1	1	1	1	3	3	4	3	4	1	3	1	1	1	3	1	1	2	2	1	3	2	1	1	1	2	0	2	1	2	1
0	2	1	1	1	1	1	1	2	1	1	1	1	1	1	1	1	1	1	2	2	3	3	3	1	2	3	1	1	1	1	1	1	1	1	1	2	1	1	2	1	1	1	2	1	2
0	1	2	1	1	1	1	1	1	1	1	1	1	1	1	1	1	1	1	1	1	1	1	1	1	1	4	1	3	1	1	1	1	1	2	1	2	1	1	1	1	0	2	2	1	1
0	1	1	1	1	1	1	1	1	1	1	1	1	1	1	1	1	1	1	4	3	2	2	4	4	2	1	2	4	2	1	1	1	2	2	1	2	1	2	1	1	0	2	2	1	1
0	1	1	1	1	1	1	1	1	2	1	1	2	1	1	1	1	1	1	2	2	2	1	4	1	1	3	1	1	1	1	1	1	2	2	1	2	1	1	2	1	0	1	2	1	1
0	1	1	1	1	1	2	1	1	1	1	1	1	1	1	1	1	1	1	3	1	2	2	2	2	3	3	3	2	2	1	1	2	2	2	1	2	1	1	1	2	0	2	2	1	1
0	1	1	1	1	1	1	1	1	1	1	1	1	1	1	1	1	1	1	4	3	3	2	3	1	4	3	3	1	3	1	1	2	2	2	1	2	1	1	2	1	1	2	2	1	1
0	2	2	1	1	1	1	1	1	1	1	1	1	1	1	1	1	1	1	1	1	1	1	1	1	1	1	1	1	3	1	1	2	2	2	1	1	1	1	2	1	1	2	2	1	1
0	2	2	1	1	1	1	1	1	1	1	1	1	1	1	1	1	1	1	1	1	1	1	2	1	1	4	1	1	1	1	1	1	1	1	1	1	1	1	1	1	1	2	2	1	1
0	2	1	1	1	1	1	1	1	2	1	1	1	1	1	1	1	2	1	2	1	4	4	3	1	3	3	4	4	1	1	2	2	1	1	1	2	1	1	2	2	0	2	2	1	1
0	1	1	1	1	1	1	1	1	2	1	1	1	1	1	1	1	1	1	2	3	3	4	1	1	3	3	1	4	3	1	1	1	2	2	1	1	1	1	2	1	1	2	2	1	1
0	1	2	1	1	1	1	1	1	1	1	1	1	1	1	1	2	1	1	3	3	3	2	3	1	1	2	3	3	1	1	2	2	2	2	1	2	1	1	1	1	1	1	1	2	1
0	1	2	1	1	1	1	1	1	1	1	1	1	1	1	1	1	1	1	1	1	3	3	2	1	3	3	4	1	2	1	2	1	1	2	1	2	1	1	1	2	0	2	2	1	1
0	2	1	1	1	1	1	1	1	1	1	1	1	1	1	1	1	1	1	2	1	1	3	4	3	4	2	1	1	3	1	1	1	1	1	1	2	1	2	2	1	1	2	2	1	2
0	1	1	1	1	1	1	1	1	1	1	1	1	1	1	1	1	1	1	1	1	2	3	3	2	3	3	3	2	3	1	1	1	1	2	1	2	1	1	2	1	2	2	2	2	2
0	1	2	1	1	1	1	1	1	1	1	1	1	1	1	1	1	1	1	2	2	1	1	1	2	4	4	1	1	2	1	1	2	1	2	1	2	1	1	2	1	1	2	2	2	2
0	1	1	1	1	1	1	1	1	1	1	1	1	1	1	1	1	1	1	4	3	4	4	1	1	4	1	4	1	2	1	1	1	2	1	3	2	1	1	1	2	1	2	2	2	1
0	1	2	1	2	1	2	1	1	1	1	1	2	1	1	2	1	1	1	1	2	1	4	1	1	1	1	1	1	2	1	1	1	3	2	1	2	1	2	1	2	1	2	1	2	1
0	2	2	1	1	1	1	1	1	1	1	1	2	2	1	1	1	1	1	1	2	1	1	4	1	3	4	1	1	2	1	1	1	2	1	1	1	1	2	2	2	1	2	2	1	1
0	1	1	1	1	1	1	1	1	1	1	1	1	2	1	1	1	1	1	1	1	1	1	3	1	1	4	1	1	1	1	1	1	2	1	1	2	1	1	1	1	1	1	2	2	1
0	2	2	1	1	2	1	1	1	1	1	1	1	1	2	1	1	1	1	1	1	1	1	4	1	1	4	1	1	2	1	1	1	1	2	1	2	1	2	1	2	1	2	2	1	1
0	2	2	1	1	1	1	1	1	1	1	1	1	1	1	1	1	1	1	3	3	3	3	4	1	1	4	1	2	1	1	1	1	1	2	1	1	1	1	1	1	0	2	2	2	1
0	1	3	1	2	1	1	1	1	1	1	1	1	1	1	1	1	1	1	2	4	2	2	3	1	1	3	4	1	2	1	1	1	1	1	3	2	2	1	1	1	1	2	2	2	2
0	1	1	1	1	1	1	1	1	1	1	1	1	1	1	1	1	1	1	4	3	3	4	3	1	4	1	1	1	2	1	1	1	2	1	1	2	1	2	2	1	2	2	2	1	2
0	2	1	1	1	1	1	1	1	1	1	1	1	1	1	1	1	1	1	1	2	1	1	3	1	1	4	1	1	2	1	1	1	3	2	1	2	1	1	2	1	2	2	2	2	2
0	1	1	1	1	1	1	1	1	1	1	1	1	1	1	1	1	1	1	4	4	2	4	2	3	4	2	4	2	3	1	1	2	2	1	1	2	1	1	2	1	0	1	2	1	1
0	2	1	1	2	1	1	1	2	2	1	1	1	1	2	1	1	2	1	4	1	1	3	4	1	1	4	1	1	1	1	1	2	1	1	1	1	1	2	1	1	1	1	2	1	1
0	1	1	1	1	1	1	1	1	1	1	1	1	1	1	1	1	1	1	2	2	2	3	4	1	4	4	1	1	2	1	1	1	2	2	2	2	1	1	1	1	1	2	2	1	1
0	1	1	1	1	1	1	1	2	1	1	1	1	1	1	1	1	1	1	2	1	1	1	3	1	4	4	1	1	3	1	1	1	2	2	3	2	2	1	2	1	0	2	1	1	1
0	2	1	1	1	1	1	1	1	2	1	1	1	1	1	1	1	2	1	1	1	1	1	1	1	1	4	1	1	2	1	1	1	2	2	1	2	1	1	2	1	0	2	2	2	1
0	1	1	1	1	1	1	1	1	1	1	1	1	1	1	1	1	1	1	1	1	1	2	3	1	1	1	1	1	1	1	1	1	1	1	1	2	2	1	2	1	0	2	1	2	1
0	1	1	1	1	1	1	1	1	1	1	1	1	1	1	1	1	1	1	4	4	4	4	1	4	4	4	3	3	2	1	1	1	1	1	1	2	2	2	2	1	1	2	2	1	1
0	1	1	1	1	1	1	1	1	1	1	1	1	1	1	1	1	1	1	2	3	2	1	2	1	2	2	2	1	2	1	1	2	2	2	2	2	2	1	2	1	1	2	2	1	1
0	1	1	1	1	1	1	1	1	1	1	1	1	1	1	1	1	1	1	1	1	1	1	4	1	4	4	1	1	3	1	1	1	2	1	3	2	2	1	1	1	1	2	2	2	1
0	1	2	1	1	1	1	1	1	1	1	1	1	1	1	1	1	1	1	1	1	1	1	4	1	4	4	1	1	1	1	2	1	3	2	2	2	2	1	2	1	2	2	1	2	2
0	2	1	1	1	1	1	1	1	1	1	1	1	2	2	1	1	2	1	2	1	2	2	1	1	1	2	1	1	1	1	1	1	1	1	3	2	3	1	1	1	0	2	2	2	1
0	2	1	1	1	1	1	1	1	1	1	1	1	1	1	1	1	1	1	3	3	2	1	3	3	3	3	3	1	2	1	1	1	1	1	1	1	3	2	1	1	1	2	2	1	1
0	2	1	2	2	1	1	1	1	2	2	1	1	1	2	2	2	1	1	2	4	3	2	4	2	1	4	2	2	1	2	2	1	1	2	2	1	3	2	1	1	1	2	2	2	2
0	2	1	1	1	1	1	1	1	1	1	1	1	1	1	2	1	1	1	1	1	1	1	4	1	1	4	1	1	2	1	1	1	2	1	1	2	2	1	2	1	0	2	2	2	1
0	1	2	1	2	1	1	1	1	1	1	1	1	1	1	2	1	1	1	1	1	1	4	4	1	3	4	1	1	1	1	1	1	2	2	1	2	3	2	1	1	1	2	2	2	1
0	2	2	1	1	1	1	1	1	1	1	1	1	1	1	1	1	1	1	1	1	1	1	1	1	1	3	1	1	2	1	1	2	2	1	1	2	3	1	2	1	2	2	2	2	2
0	2	1	2	1	1	1	1	1	1	1	1	1	1	1	1	1	1	1	1	1	1	1	4	1	4	4	1	1	3	1	1	2	2	2	2	2	2	2	2	2	0	1	1	1	1
0	2	1	1	1	1	1	1	1	1	1	1	1	1	2	1	1	1	1	2	1	1	1	1	1	1	1	1	1	2	1	1	2	1	1	1	1	3	2	1	1	2	2	2	2	2
0	2	1	1	1	1	1	1	1	1	1	1	1	1	1	1	1	1	1	1	3	1	1	2	1	4	2	3	1	2	1	1	2	1	2	3	2	2	1	1	1	0	2	2	1	1
0	1	1	1	1	1	1	1	1	1	1	2	1	1	1	1	2	1	1	4	1	4	4	3	1	3	1	4	1	1	1	2	2	3	2	1	2	2	1	1	1	1	2	2	2	1
0	1	1	1	1	1	1	1	1	1	2	1	1	2	1	1	2	1	1	1	1	1	1	1	1	1	4	1	1	2	1	1	2	2	1	2	2	2	1	2	1	1	2	2	2	1
0	1	1	1	1	1	1	1	1	2	2	1	1	1	1	2	1	1	1	1	1	1	1	4	1	3	4	1	1	2	1	1	2	1	1	1	2	3	1	1	1	0	2	2	2	1
0	1	1	2	1	1	1	1	1	1	2	1	1	1	1	1	1	1	1	1	1	1	1	4	1	1	4	2	1	3	1	1	1	1	2	2	2	3	1	2	1	2	2	2	2	2
0	1	1	1	1	1	1	1	1	1	1	1	1	1	1	1	1	1	1	1	3	1	1	4	1	3	4	1	1	2	1	1	1	3	1	3	2	3	1	1	1	1	2	2	2	1
0	1	1	1	1	1	1	1	1	1	1	1	1	1	1	1	1	1	1	4	1	1	1	2	1	1	4	1	1	2	1	1	1	1	1	1	2	3	1	2	1	1	2	2	2	1
0	2	1	1	1	1	1	1	1	1	1	1	1	1	1	1	1	1	1	2	3	2	3	3	2	4	2	2	1	3	1	2	1	1	2	2	2	3	1	1	1	2	2	2	2	2
0	1	1	1	1	2	1	1	2	1	2	1	1	1	2	1	1	1	1	4	3	4	1	2	1	4	1	1	1	2	1	1	1	2	2	2	2	2	2	1	1	1	2	2	2	1
0	1	2	1	1	1	1	1	1	1	1	1	1	1	1	1	1	1	1	1	1	1	1	1	1	1	4	1	1	2	1	1	1	2	2	2	1	3	2	1	1	0	2	2	2	1
0	2	1	1	1	1	1	1	1	2	1	1	1	1	1	2	1	2	1	1	1	1	2	3	1	1	4	1	1	2	1	1	1	2	1	2	2	3	1	2	1	1	2	2	2	1
0	2	2	1	1	1	1	1	1	1	1	1	1	1	1	1	1	2	1	1	1	3	2	4	1	3	4	1	1	2	1	2	1	1	1	2	1	3	1	2	1	1	2	2	2	1
0	2	1	1	1	1	1	1	1	1	1	1	1	1	1	1	1	1	1	1	1	1	1	4	1	2	4	1	1	3	1	1	1	2	1	2	2	2	1	2	1	1	2	2	2	1
0	2	1	1	1	1	1	1	1	1	1	1	1	1	1	1	1	1	1	4	2	2	2	1	1	4	1	4	1	3	1	2	2	2	2	1	2	3	1	2	1	1	2	2	2	1
0	2	1	1	1	1	1	1	1	2	2	1	1	1	2	1	1	1	1	1	1	1	1	4	1	2	4	1	1	2	1	1	1	3	2	2	1	3	1	2	1	0	2	2	2	1
0	2	1	1	1	1	1	1	1	1	1	1	1	1	1	1	1	1	1	1	1	4	4	1	1	1	1	1	1	2	1	1	2	2	1	3	2	3	2	2	2	1	2	2	2	2
0	2	2	1	1	1	1	1	1	1	1	1	1	1	1	1	1	1	1	1	1	1	1	2	1	1	1	1	1	3	1	1	2	2	1	1	2	2	1	2	1	1	2	2	2	1
0	1	1	1	1	1	1	1	2	1	1	1	1	1	1	1	1	1	1	2	1	1	1	4	1	2	4	2	1	3	1	2	2	3	2	2	2	3	1	2	2	1	2	2	1	1
0	1	1	1	1	1	1	1	1	1	1	1	1	1	1	1	1	1	1	2	2	3	2	4	1	3	4	1	1	2	1	1	2	1	1	2	2	2	1	2	1	2	2	2	2	2
0	1	1	1	1	1	2	1	1	1	1	1	1	1	1	1	1	1	1	1	2	1	1	4	2	1	4	1	1	3	1	1	1	2	1	3	2	3	2	2	1	1	2	2	2	2
0	2	3	1	1	1	1	1	1	1	1	1	1	1	1	1	1	1	1	2	1	2	1	4	1	2	4	1	1	3	1	1	1	2	1	3	2	3	2	2	1	0	2	2	2	1
0	2	1	1	1	1	1	1	1	1	1	1	2	1	1	1	1	1	1	3	3	3	3	4	1	3	4	3	1	1	1	1	1	1	1	3	2	3	2	2	1	1	2	2	1	1
0	1	2	2	1	1	1	1	1	1	1	1	1	1	1	1	1	1	1	1	1	1	1	4	1	4	1	1	1	2	1	1	2	3	1	3	2	3	1	2	1	1	1	2	1	1
0	1	2	1	1	1	1	1	1	1	1	1	1	1	1	1	1	1	1	3	3	3	3	1	3	3	3	3	1	1	1	1	1	1	1	1	2	1	1	2	1	0	2	2	1	1
0	1	3	1	1	1	1	1	1	1	1	1	1	1	1	1	1	1	1	1	1	1	2	2	1	1	2	1	1	2	1	1	1	2	2	1	1	1	1	1	2	0	2	2	1	1
0	2	1	1	1	1	1	1	1	1	1	1	1	1	1	1	1	1	1	4	4	4	1	1	1	4	1	1	1	2	1	1	1	3	2	1	2	1	1	1	1	1	2	2	1	1
0	1	4	1	1	1	1	1	1	1	1	1	1	1	1	1	1	1	1	1	1	1	3	4	1	1	4	1	1	3	1	1	1	1	2	1	2	1	1	1	1	1	2	2	1	1
0	1	1	1	1	2	1	1	1	1	1	1	1	1	1	1	1	1	1	2	3	3	3	4	1	2	3	1	1	2	1	1	1	1	1	1	2	1	1	2	1	1	2	2	2	2
0	1	3	1	1	1	1	1	1	1	1	1	1	1	1	1	1	1	1	2	3	1	2	2	2	1	2	2	1	2	2	2	2	2	2	1	2	1	1	1	1	1	2	2	1	1
0	1	2	1	1	1	1	1	1	1	1	2	1	1	1	1	1	1	1	1	1	3	4	4	1	1	4	1	1	2	1	1	2	3	2	1	2	1	1	2	1	0	1	2	1	1
0	1	1	1	1	1	1	1	1	1	1	1	1	1	1	1	1	1	1	1	3	1	1	4	1	2	4	1	1	3	1	1	1	3	2	3	2	3	2	1	1	1	2	2	1	1
0	1	1	1	1	1	1	1	1	1	1	1	1	1	1	1	1	1	1	1	1	1	1	1	1	1	4	1	1	2	1	1	1	2	2	3	2	1	1	2	1	0	1	2	2	1
0	1	2	1	1	1	1	1	1	1	1	1	1	1	1	1	1	1	1	1	1	1	1	1	1	1	4	1	1	3	1	1	1	2	2	1	2	1	1	2	2	0	2	2	1	1
0	1	1	1	1	1	1	1	1	1	1	1	1	1	1	1	1	1	1	1	1	1	1	4	1	1	4	1	1	3	1	1	2	2	2	1	2	1	1	2	1	0	2	2	1	1
0	1	2	1	1	1	1	1	1	1	1	1	1	1	1	1	1	1	1	1	1	2	1	4	1	1	4	1	1	3	1	1	1	1	2	1	2	1	1	1	1	1	1	2	1	1
0	2	1	1	1	1	1	1	1	1	1	1	1	1	1	1	1	1	1	1	1	1	1	4	1	3	4	1	1	2	1	1	2	2	2	1	2	1	1	2	1	0	1	2	2	1
0	1	1	1	1	1	1	1	2	2	2	1	1	1	1	1	1	1	1	1	1	1	1	4	1	1	4	1	1	3	1	1	1	2	2	2	2	1	1	2	1	1	2	2	1	1
0	2	3	1	1	1	1	1	1	1	1	1	1	1	1	1	1	1	1	1	1	1	1	4	1	1	4	1	1	2	1	1	1	2	2	1	1	1	1	1	1	2	1	2	1	2
0	1	2	1	1	1	1	1	1	1	1	1	1	1	1	1	1	1	1	1	1	1	1	1	1	1	4	1	1	2	1	1	1	1	1	1	2	1	1	2	1	1	2	2	2	2
0	1	1	1	1	1	1	1	1	1	1	1	1	1	1	1	1	2	1	2	1	1	1	4	1	1	4	1	1	1	1	1	1	1	1	1	2	3	1	1	1	1	1	2	1	1
0	2	1	1	1	1	1	1	1	1	1	1	1	1	1	1	1	1	1	3	1	1	1	4	1	1	4	1	1	2	1	1	1	2	2	1	2	1	1	2	1	0	1	2	1	1
0	1	1	1	1	1	2	1	1	1	1	1	1	1	1	1	2	1	1	1	1	1	1	4	1	1	4	1	1	3	1	1	1	1	1	1	2	3	1	1	1	2	1	2	2	2
0	2	1	1	1	1	1	1	1	1	1	1	1	1	1	1	1	1	1	1	4	3	4	4	1	3	1	1	4	1	1	1	1	2	2	1	2	1	1	1	2	0	2	2	1	1
0	2	1	1	1	1	1	1	2	1	1	1	1	1	1	1	1	1	1	2	1	1	1	4	1	3	4	3	1	2	1	1	2	2	2	1	2	1	1	2	2	1	2	2	1	1
0	2	3	1	1	1	1	1	1	1	1	1	1	1	1	1	1	1	1	1	1	1	3	4	1	3	4	1	1	3	1	2	2	2	2	1	2	1	1	2	1	1	2	2	1	1
0	1	2	1	1	1	1	1	1	1	1	2	1	1	1	1	1	1	1	1	1	1	1	4	1	2	3	1	1	2	1	1	1	2	2	1	1	1	1	1	2	1	2	2	1	1
0	2	1	1	1	1	1	1	1	1	1	1	1	1	1	1	1	2	1	3	3	3	1	4	1	3	4	1	1	2	1	1	1	2	2	2	2	1	1	1	1	1	1	2	1	1
0	1	2	1	1	1	1	1	1	1	1	1	1	1	1	1	1	1	1	4	3	4	4	4	4	4	4	1	1	2	1	1	2	3	2	1	2	1	1	1	1	0	2	2	1	1
0	2	1	1	1	1	1	1	2	1	1	1	1	1	1	1	1	1	1	3	2	1	2	4	1	2	1	2	1	1	1	1	1	2	1	1	2	1	1	1	2	1	2	2	1	1
0	2	1	1	1	1	1	1	1	1	1	1	1	1	1	1	1	1	1	4	4	4	1	1	1	4	1	1	1	2	1	1	1	2	2	1	2	1	1	1	1	0	2	2	1	1
0	2	1	1	1	1	1	1	2	1	1	1	1	1	1	1	1	1	1	1	1	4	4	1	4	4	1	1	1	3	1	1	1	2	2	1	2	1	2	2	2	1	2	2	2	1
0	2	1	1	1	1	1	1	1	1	1	1	1	1	1	1	1	1	1	1	1	1	1	4	1	1	4	1	1	2	1	1	2	2	2	1	1	1	1	2	2	0	2	2	1	1
1	1	1	1	1	1	1	2	1	1	1	1	1	1	1	1	1	1	1	1	1	1	1	1	1	1	1	1	1	1	1	1	2	1	2	1	2	1	2	2	2	1	2	2	1	1
0	1	1	1	1	1	1	1	1	1	1	1	1	1	1	1	1	1	1	3	2	4	3	2	3	2	4	4	3	2	1	1	1	1	1	2	2	1	1	1	1	0	2	2	2	1
0	2	2	1	1	1	1	1	1	2	1	1	1	1	1	1	1	1	1	1	1	1	1	4	1	1	4	1	1	1	1	1	1	1	2	1	1	1	1	2	2	0	2	2	1	1
0	2	2	1	1	1	1	1	1	1	1	1	1	1	1	1	1	1	1	1	1	2	2	2	1	1	4	1	1	2	1	2	1	2	1	1	1	1	1	2	2	1	2	2	1	1
0	1	1	1	2	1	1	1	1	1	1	1	1	1	1	1	1	1	1	1	3	1	1	4	1	1	4	1	1	2	1	2	2	3	2	1	2	1	1	1	2	1	2	2	1	1
0	1	2	1	1	1	1	1	1	1	1	1	1	1	1	1	1	1	1	1	2	2	3	1	1	1	4	1	1	2	1	1	2	2	2	2	2	1	1	1	2	0	2	2	1	1
0	2	2	2	1	1	1	1	1	1	1	1	1	1	1	1	1	1	1	4	4	4	1	1	4	2	1	1	4	2	1	1	2	2	2	1	2	1	1	1	1	1	2	2	1	2
0	1	3	1	1	1	1	2	1	1	1	1	1	1	1	1	1	1	1	2	2	1	1	4	1	1	4	1	1	2	1	1	2	2	1	3	2	1	1	2	1	1	1	2	1	1
0	2	1	1	1	1	1	1	1	1	1	1	2	1	1	1	1	2	1	2	1	1	2	4	1	1	4	1	1	1	1	2	1	3	2	1	2	1	1	1	1	1	2	2	2	1
0	1	1	1	1	1	1	1	1	1	1	1	1	1	1	1	1	1	1	4	1	4	2	3	3	3	1	3	1	3	1	1	2	2	2	1	2	1	1	2	2	0	2	2	2	1
0	2	1	1	1	1	1	1	1	2	1	1	1	1	2	1	1	2	1	1	1	1	1	4	1	1	4	1	1	2	1	1	1	2	2	1	2	1	1	2	1	1	2	2	1	1
0	1	2	1	1	1	1	1	1	1	1	1	1	1	1	1	1	2	1	2	2	2	2	2	1	1	3	4	1	2	1	2	2	2	1	1	2	1	1	2	1	2	2	2	1	2
1	1	1	1	1	1	1	1	1	1	1	1	1	1	1	1	1	1	1	2	1	1	1	1	1	1	1	1	1	2	1	1	1	2	1	1	1	1	1	2	1	1	2	2	1	1
0	2	2	1	1	1	1	1	1	1	1	1	1	1	1	2	2	1	1	1	1	1	1	1	1	1	4	1	1	1	1	1	1	3	1	1	1	3	1	2	1	1	2	2	1	2
0	1	1	1	1	1	1	1	1	1	1	1	1	1	1	1	1	1	1	1	1	1	1	1	1	1	3	1	1	2	1	1	1	2	2	3	2	1	1	1	2	1	2	2	1	1
0	1	1	1	1	1	1	1	1	1	1	1	1	1	1	1	1	1	1	1	3	3	3	1	3	3	3	3	1	2	1	1	1	2	2	1	2	1	1	2	2	0	2	2	1	1
0	1	1	1	1	1	1	1	1	1	1	1	1	1	1	1	1	1	1	1	3	3	3	1	1	1	2	1	1	2	1	1	1	2	2	1	2	1	1	1	2	1	2	2	1	1
0	1	1	1	1	1	1	1	1	1	1	1	1	1	1	1	1	1	1	1	1	1	1	1	1	3	1	1	1	3	1	1	1	2	1	1	2	1	1	2	1	0	2	2	1	1
0	2	3	1	1	1	1	1	1	2	1	1	1	1	1	1	1	1	1	4	2	4	3	3	1	3	3	2	2	2	1	1	1	1	1	1	1	1	1	2	1	0	1	2	1	1
0	2	1	1	1	1	1	1	2	1	2	1	1	1	1	1	1	1	1	4	4	4	4	1	4	4	1	4	4	2	1	1	1	2	2	1	2	1	1	2	1	1	1	2	1	1
0	1	1	1	1	1	1	1	1	1	1	1	2	1	1	1	1	1	1	3	3	2	1	3	1	3	4	1	1	2	1	1	1	2	2	3	2	1	1	1	1	1	2	2	1	1
0	1	2	1	1	1	1	1	1	1	1	1	1	1	1	1	1	1	1	3	2	3	3	1	1	1	3	3	4	2	1	1	1	2	2	1	2	1	1	1	1	1	1	2	1	1
0	2	1	1	1	1	1	1	1	1	2	1	1	1	1	1	1	1	1	1	1	1	1	4	1	1	4	1	1	2	1	1	1	2	2	1	2	1	2	2	2	0	2	2	1	1
0	1	1	1	1	1	1	1	1	1	1	1	1	1	1	1	1	1	1	4	4	3	4	1	3	3	4	1	2	2	1	1	2	2	2	3	1	1	2	2	1	0	2	2	1	1
0	1	1	1	1	1	1	1	1	1	1	1	1	1	1	1	1	1	1	1	3	4	3	4	1	3	3	4	3	2	1	2	2	2	2	3	2	1	1	2	2	0	2	2	1	1
1	1	2	1	1	2	1	1	1	2	1	1	1	1	2	1	2	2	1	1	4	1	1	1	4	4	1	4	3	1	2	1	1	3	1	3	2	1	2	1	2	1	2	2	1	1
0	1	2	1	1	2	2	1	2	1	1	1	1	1	1	2	1	1	1	1	3	3	3	1	1	4	3	3	3	3	1	1	1	3	2	1	2	1	1	1	1	1	1	2	1	1
0	2	2	1	1	1	1	1	1	1	1	1	1	1	1	1	1	1	1	2	1	1	1	4	1	1	4	1	1	3	1	1	1	1	1	1	2	1	1	1	1	1	2	2	1	1
0	1	2	1	1	1	1	1	1	1	1	1	1	1	1	1	1	1	1	1	1	1	1	4	1	1	4	1	1	2	1	1	1	2	2	1	1	1	1	2	2	0	2	2	1	1
0	2	1	1	1	1	1	1	1	1	1	1	1	1	1	1	1	1	1	2	2	3	2	4	2	2	2	2	1	2	1	1	2	2	2	1	2	1	2	1	1	0	2	2	1	1
0	1	1	1	1	1	1	1	1	1	2	1	1	1	1	1	1	2	2	3	3	4	2	4	3	1	4	1	1	3	1	1	1	3	2	1	2	1	1	1	1	1	2	2	1	1
0	2	1	1	1	1	1	1	1	1	1	1	1	1	1	1	1	1	1	1	1	1	1	4	1	1	4	1	1	2	1	1	1	2	2	1	2	1	2	1	1	1	2	2	1	1
0	1	1	1	1	1	1	1	1	1	1	1	1	1	1	1	1	1	1	1	1	1	1	4	1	1	4	1	1	2	1	1	1	2	1	2	2	1	2	1	2	0	2	2	1	1
1	1	1	1	1	1	1	1	1	1	1	1	1	1	1	1	1	1	1	1	1	1	1	4	1	1	4	1	1	2	1	2	2	2	2	3	2	1	2	2	2	0	2	2	1	1
0	1	1	1	1	1	1	1	1	1	1	1	1	1	1	1	1	1	1	4	4	4	4	1	1	1	1	4	4	1	1	1	1	1	2	1	2	1	1	1	1	1	2	2	1	1
0	2	3	1	1	1	1	1	1	1	1	1	1	1	1	1	1	1	1	1	1	2	2	1	1	1	4	2	1	2	1	1	1	1	1	1	1	1	2	1	2	1	2	2	1	1
0	1	1	2	1	1	1	1	1	1	1	1	1	1	1	1	1	1	1	1	1	1	1	1	1	1	4	1	1	2	1	1	1	2	2	1	2	1	2	1	1	1	2	2	1	1
0	2	3	1	1	1	1	1	1	1	1	1	1	1	1	1	1	2	1	1	1	1	2	3	1	1	1	1	1	2	1	1	1	1	2	1	1	1	1	2	2	0	2	2	1	1
0	1	1	1	1	1	1	1	1	1	1	1	1	1	1	1	1	1	1	4	4	4	4	4	4	4	1	1	1	1	1	1	1	3	2	1	2	3	2	1	1	1	2	2	1	2
0	1	1	1	1	1	1	1	1	1	1	1	1	1	1	1	1	2	1	3	3	3	3	2	1	2	3	3	1	1	1	1	1	3	1	2	2	1	1	1	1	1	1	2	1	1
0	1	1	1	1	1	1	1	1	1	1	1	1	1	1	1	1	1	1	1	1	1	2	1	1	4	2	1	1	3	1	1	1	2	1	3	2	1	2	1	2	1	2	1	2	1
0	1	2	1	1	1	1	1	1	1	1	1	1	1	1	1	1	1	1	1	1	3	2	4	1	1	2	1	1	2	1	1	1	2	1	2	2	1	2	2	2	1	2	2	1	1
0	1	2	1	1	1	1	1	1	1	1	1	1	1	1	1	1	2	1	2	1	1	4	1	4	1	1	1	1	2	1	1	2	2	1	1	2	1	2	1	2	0	2	2	1	1
0	2	2	1	1	1	1	1	2	1	1	1	1	1	1	1	1	1	1	2	3	4	3	1	4	1	3	2	1	2	1	1	1	2	1	1	1	1	2	1	2	0	2	2	1	1
0	2	1	1	1	1	1	1	1	1	1	1	1	1	1	1	1	1	1	1	2	3	1	2	1	2	2	2	1	1	1	1	2	2	2	1	2	1	2	2	1	0	2	2	1	1
0	2	1	1	1	1	1	1	1	1	1	1	1	1	1	1	1	1	1	1	2	1	1	4	1	4	4	1	1	2	1	1	2	2	2	1	2	1	1	2	1	1	2	2	1	1
0	2	2	1	1	1	1	1	1	1	1	1	1	1	1	1	1	1	1	1	1	1	4	1	1	1	4	1	1	2	1	1	1	2	1	1	2	1	1	1	1	1	1	2	1	1
0	1	2	1	1	1	1	1	2	1	1	1	1	1	1	1	1	1	1	1	1	1	1	4	1	4	4	1	1	2	1	1	1	2	2	1	1	1	1	1	1	2	2	2	1	2
0	1	1	1	1	1	1	1	1	1	1	1	1	1	1	1	1	1	1	1	2	1	1	1	1	1	4	4	1	2	1	1	2	1	2	1	2	1	1	1	1	1	2	2	1	2
0	1	2	1	1	1	1	1	2	2	2	1	1	2	1	2	1	1	1	1	1	1	4	1	4	1	1	4	1	1	1	1	2	1	2	1	2	1	2	2	1	1	1	2	1	1
0	1	3	1	1	1	1	1	1	1	1	1	1	1	1	1	2	1	1	1	1	1	1	3	1	1	4	1	1	2	1	2	2	2	2	1	2	1	1	2	2	1	2	2	1	1
0	2	1	1	1	1	1	1	2	1	1	1	1	1	1	1	1	1	1	1	1	1	1	4	1	1	4	1	1	2	1	1	2	2	2	1	2	1	1	2	1	0	2	2	1	1
0	2	1	1	1	1	1	1	1	1	2	1	1	1	1	1	1	2	1	1	1	1	1	4	1	1	4	1	1	2	1	1	1	2	2	1	2	1	1	2	1	1	2	2	1	1
0	2	1	1	1	1	1	1	1	1	1	1	1	1	1	1	1	1	1	1	1	1	1	4	1	1	3	1	1	3	1	1	1	3	2	1	2	1	2	1	1	0	2	1	2	1
0	2	1	1	1	1	1	1	2	1	1	1	1	1	1	1	1	1	1	4	4	4	4	1	4	4	1	2	4	2	1	1	1	2	2	1	2	1	1	2	2	0	2	2	1	1
0	1	1	1	1	1	1	1	1	1	1	1	1	1	1	1	1	1	1	2	1	1	1	2	3	2	3	1	3	2	1	2	2	2	2	1	2	1	1	1	2	0	2	2	1	1
0	1	1	1	1	1	1	1	1	1	1	1	1	1	1	1	1	1	1	1	3	1	1	1	1	1	4	4	1	2	1	2	2	2	2	1	2	1	2	1	2	1	2	2	1	1
1	2	1	1	1	1	1	1	2	1	1	1	1	1	1	1	1	1	1	1	1	1	1	4	1	1	4	1	1	1	1	1	2	1	2	1	2	1	2	1	1	1	2	2	1	1
0	2	2	1	1	1	1	1	1	1	1	1	1	1	1	1	2	1	1	2	2	1	1	4	1	2	4	1	1	2	1	2	2	2	2	1	1	1	1	1	1	1	2	2	2	1
0	1	1	1	1	1	1	1	1	1	1	1	1	2	1	1	1	1	1	1	1	1	2	1	3	2	3	1	4	2	1	1	2	2	2	1	2	1	1	2	2	0	2	2	2	1
0	1	1	1	1	1	2	1	1	1	1	1	1	1	1	1	1	1	1	1	1	1	2	3	1	4	4	2	1	2	1	1	2	2	2	2	2	1	1	2	2	0	1	2	1	1
0	2	3	1	1	1	1	1	1	1	1	1	1	1	1	1	1	1	1	1	3	2	1	4	1	1	4	1	1	2	1	1	1	2	1	1	1	3	1	2	1	1	2	2	2	2
0	2	1	1	1	1	1	1	1	1	1	1	1	1	1	1	1	1	1	1	1	2	1	4	1	2	2	1	1	2	1	1	1	2	2	2	2	3	2	1	1	0	2	2	2	1
0	1	1	1	1	1	1	1	1	2	1	1	1	1	1	1	1	1	1	1	2	2	1	4	1	4	4	2	1	2	1	1	1	1	1	1	2	3	1	2	1	1	2	2	2	2
0	1	2	1	1	1	1	1	1	1	1	1	1	1	1	1	1	1	1	1	1	1	1	2	1	1	2	1	1	3	1	1	1	2	2	4	1	3	2	2	1	1	2	2	1	1
0	2	1	1	1	1	1	1	1	1	1	1	1	1	1	1	1	1	1	1	2	2	1	3	1	2	2	2	1	3	1	1	2	3	2	2	2	3	2	1	1	1	1	2	2	1
0	1	1	1	1	1	1	1	1	1	1	1	1	1	1	1	1	1	1	3	1	2	1	4	3	3	4	1	1	3	1	1	1	2	2	2	2	3	2	1	1	0	2	2	2	1
0	2	1	1	1	1	2	2	2	2	1	1	1	1	2	1	1	2	2	1	1	1	1	4	1	1	4	1	1	1	1	1	2	2	2	3	1	3	1	2	2	2	2	2	2	2
0	1	1	2	2	1	1	1	1	1	1	1	1	1	1	2	1	1	1	2	3	2	2	2	2	4	1	4	2	2	1	1	2	1	2	2	2	3	1	1	1	1	1	2	2	2
0	2	2	1	1	1	2	1	1	1	1	1	1	1	1	1	1	1	1	2	1	1	4	4	3	2	2	2	2	1	1	2	1	2	2	1	1	3	1	2	1	1	2	2	1	1
0	2	2	1	1	1	1	1	1	1	1	1	2	2	1	2	2	1	1	1	1	1	3	3	1	1	4	1	1	1	1	1	1	1	2	2	1	2	2	1	1	1	1	2	1	1
0	1	3	1	1	1	1	1	2	2	1	1	1	2	1	1	1	2	1	3	2	3	3	3	3	3	2	2	3	1	1	1	2	2	2	1	2	3	2	2	1	1	2	2	1	1
0	2	1	1	1	1	1	2	2	1	1	1	1	1	1	1	1	2	1	2	2	3	1	4	3	4	2	2	2	1	1	1	1	3	2	2	1	3	2	1	1	1	1	2	1	1
0	2	2	1	1	1	1	1	1	1	1	1	1	1	1	1	1	1	1	2	3	2	3	1	1	3	1	1	1	2	1	1	1	2	1	1	1	3	1	2	1	0	1	2	1	1
0	1	2	1	1	1	1	1	1	1	1	1	1	1	1	1	1	1	1	1	2	3	4	1	1	1	4	1	1	2	1	1	1	2	1	2	2	3	1	1	2	0	1	2	1	1
0	2	1	1	1	1	1	1	1	1	1	1	1	1	1	1	1	1	1	1	1	1	1	4	1	1	4	1	1	2	1	1	2	2	2	4	2	3	2	1	1	0	2	1	2	1
0	2	1	1	1	1	1	1	2	2	2	1	2	1	1	2	1	2	1	1	1	1	1	4	1	1	4	1	1	2	1	2	1	1	1	2	1	3	1	2	1	1	2	2	1	2
0	1	1	1	1	1	1	1	1	2	1	1	1	1	1	1	1	1	1	3	2	3	2	2	2	1	2	1	4	2	1	1	2	2	2	1	2	3	1	2	1	2	2	2	1	2
0	1	3	1	1	1	1	1	1	1	1	1	1	1	1	1	1	1	1	1	4	4	4	1	3	4	1	4	3	3	1	1	1	2	1	1	2	3	2	1	2	1	1	2	1	1
0	1	1	1	1	1	1	1	1	1	1	1	1	1	1	1	1	1	1	4	3	3	3	4	1	1	4	3	1	2	1	1	2	1	2	1	2	3	1	2	1	1	1	2	1	2
0	2	1	1	1	1	1	1	1	1	1	1	1	1	2	1	1	1	1	1	2	3	4	2	1	4	1	1	1	2	1	2	2	2	2	3	1	3	1	2	1	0	1	2	1	1
0	2	1	1	1	1	1	1	1	1	1	1	1	1	1	2	1	1	1	1	1	1	1	4	1	2	4	1	1	3	1	1	2	2	1	1	2	3	1	2	1	2	2	1	2	2
0	1	2	1	1	1	1	1	1	1	1	1	1	1	1	1	1	1	1	1	1	2	4	1	1	4	3	1	1	3	1	2	2	2	1	1	2	1	1	1	1	0	2	1	2	1
0	1	1	1	1	1	1	1	1	1	1	1	1	1	2	1	1	2	1	3	1	1	1	4	1	1	4	1	1	2	1	1	1	1	1	2	2	1	1	1	1	1	1	2	1	1
0	1	1	1	1	1	1	1	1	1	1	1	1	1	1	1	1	1	1	3	3	4	4	2	1	3	1	3	3	3	1	1	1	2	2	3	2	1	1	2	2	1	2	2	1	1
0	2	1	1	1	1	1	1	1	1	1	1	1	1	1	1	1	1	1	1	1	1	1	4	1	1	4	1	1	3	1	1	1	2	2	1	2	1	1	2	1	1	2	2	1	1
0	2	2	1	1	1	1	1	1	1	1	1	2	1	1	1	1	1	1	1	1	3	3	1	1	1	4	1	1	2	1	1	1	2	2	1	2	1	1	1	1	0	1	2	1	1
0	2	2	1	1	1	1	1	1	1	1	1	1	1	1	1	1	2	1	1	1	1	1	4	1	1	4	1	1	1	1	1	1	2	2	1	2	1	1	1	1	1	1	2	2	1
0	1	1	1	1	1	2	1	1	1	1	1	1	1	1	1	1	1	1	2	4	4	4	4	4	4	2	1	4	2	1	1	1	2	2	2	2	3	2	2	1	1	2	2	1	1
0	2	1	1	1	1	1	1	2	1	1	1	1	1	1	1	1	1	1	1	1	1	1	2	1	2	4	1	1	3	1	1	2	2	2	1	2	3	1	2	2	0	2	2	1	1
0	1	1	1	1	1	1	1	1	1	1	1	1	1	1	1	1	1	1	3	3	1	4	4	1	1	4	2	1	2	1	1	1	2	2	3	2	3	1	1	2	0	1	1	2	1
0	1	1	1	1	1	1	1	1	1	1	1	1	1	1	1	1	1	1	1	1	4	4	1	4	4	1	1	4	3	1	1	1	2	2	2	2	3	1	1	2	0	2	2	1	1
0	2	1	1	1	1	1	1	1	1	1	1	1	1	1	1	1	1	1	1	1	1	1	1	1	3	4	1	1	2	1	1	1	1	2	2	2	3	1	1	1	0	1	2	1	1
0	2	1	1	1	1	1	1	1	1	1	1	1	1	1	1	1	1	1	1	2	3	2	4	1	1	4	1	1	2	1	1	2	2	2	1	2	1	2	1	1	1	2	2	2	1
0	1	2	1	1	1	1	1	1	1	1	1	1	1	1	1	1	1	1	1	1	1	2	1	2	3	2	4	1	3	1	1	1	2	2	1	2	1	1	2	1	0	2	2	2	1
0	2	2	1	1	1	1	1	1	1	1	1	1	1	1	1	1	1	1	1	1	1	1	4	1	1	4	1	1	2	1	1	1	2	1	1	2	1	1	1	2	0	1	2	2	1
0	1	2	1	1	1	1	1	1	1	1	1	1	1	1	1	1	1	1	1	3	1	1	1	1	4	3	1	1	2	1	1	1	2	1	1	2	1	1	1	1	1	2	2	2	1
0	1	2	1	1	1	1	1	1	1	1	1	1	1	1	1	1	1	1	1	1	2	1	1	1	2	3	1	1	1	1	1	1	2	2	1	2	1	1	1	1	1	2	2	2	1
0	1	1	1	1	1	1	1	2	2	2	1	1	1	1	1	1	1	1	2	3	1	1	4	1	1	4	1	1	1	1	2	2	2	2	1	2	1	1	2	1	1	2	2	1	1
0	2	1	1	1	1	1	1	1	1	1	1	1	1	2	1	1	1	1	1	1	2	1	1	1	1	1	1	1	3	1	1	1	2	2	1	2	1	1	2	1	1	2	2	1	1
0	1	1	1	1	1	1	1	1	1	1	1	1	1	1	1	1	1	1	1	1	1	2	1	1	1	4	1	1	3	1	1	2	2	2	2	2	1	2	1	2	1	2	2	1	1
0	1	2	1	1	1	1	1	1	1	1	1	1	1	1	1	1	1	1	3	1	2	3	3	1	1	2	1	1	2	1	1	1	2	2	1	2	1	1	1	2	0	2	2	1	1
0	1	2	1	1	1	1	1	1	1	1	1	1	1	2	1	1	1	1	1	1	1	1	1	1	1	4	4	1	1	1	1	1	2	2	3	1	3	1	1	1	0	2	2	1	1
0	1	1	1	1	1	1	1	1	1	2	1	1	1	1	1	1	1	1	4	4	4	4	3	3	4	3	3	1	1	1	1	1	1	1	1	2	1	1	2	2	0	2	2	1	1
0	1	1	1	1	1	1	1	2	1	1	1	1	1	1	1	1	1	1	3	1	4	1	1	1	3	1	2	2	2	1	1	1	1	2	1	1	1	1	2	2	0	2	2	1	1
0	2	1	1	1	1	1	1	2	2	1	1	1	1	2	1	1	2	1	1	2	1	2	4	2	2	3	2	1	2	1	1	1	3	1	1	2	1	1	2	2	0	2	2	2	1
0	1	1	1	1	1	2	1	1	2	2	1	1	1	2	1	2	2	1	2	2	1	4	4	4	4	4	1	4	2	1	2	2	2	2	1	2	1	1	1	2	0	2	2	1	1
0	2	1	1	1	1	1	1	1	1	1	1	1	1	1	1	1	2	1	3	3	1	1	4	1	4	3	4	3	2	1	1	2	2	1	1	1	1	1	1	1	1	2	2	1	1
0	2	1	1	1	1	1	1	1	2	1	1	1	1	1	1	1	2	1	2	2	2	1	1	1	4	1	3	1	1	1	1	1	2	1	1	2	1	1	2	1	1	1	2	1	1
0	1	2	1	1	1	1	1	2	1	1	1	2	1	1	1	1	2	1	1	2	1	1	4	1	1	4	1	1	1	1	2	2	2	2	2	2	1	1	2	1	1	1	2	1	1
0	2	3	1	1	1	1	1	1	1	1	1	1	1	1	1	1	1	1	1	1	1	1	3	1	1	3	1	1	2	1	1	2	2	2	1	2	1	1	1	2	0	2	2	1	1
0	1	1	1	1	1	1	1	1	1	1	1	1	1	1	1	1	1	1	1	1	1	1	1	1	1	1	1	1	2	1	2	2	2	2	1	2	1	2	2	2	1	2	2	1	2
0	2	1	1	1	1	1	1	1	1	1	1	1	1	1	1	1	1	1	1	1	1	1	1	1	1	1	1	1	2	1	1	1	1	1	1	2	1	2	2	1	1	2	2	1	1
0	1	1	1	1	1	1	1	1	1	1	1	1	2	1	1	1	2	1	1	1	1	1	4	1	1	4	1	1	2	1	1	2	1	2	1	2	1	1	1	1	1	2	2	1	1
0	1	1	1	1	1	1	1	1	1	1	1	1	1	1	1	1	1	1	1	1	1	1	4	1	1	4	1	1	1	1	2	1	3	2	1	2	1	1	2	1	1	2	1	2	1
0	1	3	1	1	1	1	1	1	1	1	1	1	1	1	2	1	2	1	2	3	3	3	2	2	2	2	3	3	1	1	1	1	1	1	1	2	1	1	2	2	1	2	2	1	2
0	2	1	1	1	1	1	1	1	1	1	1	1	1	1	1	1	1	1	1	1	1	2	2	1	1	3	1	1	2	1	1	1	3	1	1	2	1	1	1	2	0	2	2	1	1
0	1	1	1	1	1	1	1	2	1	1	1	1	1	1	1	1	1	1	4	1	1	4	1	4	3	1	1	2	1	1	2	1	1	2	1	2	1	1	1	1	0	2	2	1	1
0	2	1	1	1	1	1	1	1	1	1	1	1	1	1	1	1	1	1	1	2	2	2	2	1	1	3	1	1	2	1	1	1	2	2	1	2	1	1	1	1	1	2	2	1	1
0	2	1	1	1	1	1	1	1	1	1	1	1	1	1	1	1	1	1	1	1	1	1	4	1	1	4	1	1	3	1	2	2	2	1	1	2	1	1	1	1	1	2	2	1	1
0	1	2	1	1	1	1	1	2	1	1	1	1	1	1	1	1	1	1	1	4	1	4	1	1	1	4	1	1	2	1	2	2	2	2	2	1	1	1	1	1	1	2	2	1	1
0	2	2	1	1	1	1	1	1	1	1	1	1	1	1	1	1	1	1	4	2	1	1	1	1	2	4	2	1	3	1	1	1	2	1	2	1	1	1	1	1	1	2	2	1	1
0	1	2	1	1	1	1	1	1	1	1	1	1	1	2	1	1	1	1	1	1	1	4	1	1	1	4	1	1	2	1	1	1	2	2	1	2	1	2	2	1	1	1	2	1	1
0	1	1	1	1	1	1	1	1	1	1	1	1	1	1	1	1	1	1	1	1	1	1	4	1	1	1	4	1	3	1	1	1	3	1	1	1	2	1	1	1	1	1	2	1	1
0	1	1	1	1	1	1	1	1	1	1	1	1	1	1	1	1	1	1	1	1	1	1	4	1	1	4	1	1	3	1	1	2	2	1	1	2	1	1	2	1	1	2	2	1	1
0	2	2	1	1	1	1	1	1	1	1	1	1	1	1	1	1	1	1	3	3	1	4	4	1	3	3	4	1	3	1	1	1	2	2	1	1	1	1	1	1	0	1	2	1	1
0	1	1	1	1	1	1	1	1	1	1	1	1	1	1	1	1	1	1	1	1	1	1	4	1	2	4	1	1	3	1	1	1	2	2	1	2	1	2	2	1	1	1	2	1	2
0	2	1	1	1	1	1	1	2	2	1	1	1	1	2	1	1	1	1	1	1	2	1	1	1	1	4	1	1	2	1	1	1	2	1	1	2	1	2	1	1	1	2	2	2	1
0	2	1	1	1	1	1	1	1	1	1	1	1	1	1	1	1	1	1	1	1	1	1	1	1	4	2	3	4	3	1	2	1	2	1	1	2	1	1	1	2	1	1	2	1	1
0	1	1	1	1	1	1	1	1	1	1	1	1	1	1	1	1	1	1	2	4	2	4	2	1	4	2	1	1	3	1	1	1	1	2	1	2	1	2	1	1	1	2	2	1	1
0	1	1	1	1	1	1	1	1	1	1	1	1	1	1	1	1	1	1	1	1	1	1	4	1	1	4	1	1	2	1	2	2	1	1	1	2	1	2	1	1	1	2	2	1	1
0	2	2	1	1	1	1	1	1	1	1	1	1	1	1	1	1	1	1	1	1	1	3	1	1	1	4	1	1	3	1	1	2	2	1	2	2	3	1	2	1	0	2	2	1	1
0	2	2	1	1	1	1	1	1	1	1	1	1	1	2	1	1	1	1	1	1	1	1	1	1	4	1	2	1	2	1	1	2	2	2	3	1	3	1	1	1	0	1	2	1	1
0	1	3	1	1	1	1	1	2	1	1	1	1	1	1	1	1	1	1	4	1	2	2	4	1	1	4	2	2	3	1	1	1	3	2	3	1	3	1	2	2	2	2	2	1	2
0	1	3	1	1	1	1	1	1	1	1	1	1	1	1	1	1	1	1	3	1	1	4	1	1	1	1	4	1	2	1	1	1	1	1	1	2	1	2	1	1	1	2	2	1	1
0	2	1	1	1	1	1	1	2	1	1	1	1	1	1	1	1	1	1	1	1	1	1	1	1	1	4	1	1	3	1	2	2	3	2	1	1	1	1	1	1	1	2	2	1	1
0	1	1	1	1	1	1	1	1	2	2	1	1	1	1	1	1	1	1	1	1	1	1	1	1	1	2	1	2	3	1	1	1	2	2	2	2	1	1	1	1	1	2	2	1	1
0	2	1	1	1	1	1	1	2	1	1	1	1	1	2	2	1	1	1	1	1	1	1	1	1	1	3	1	1	1	1	1	1	3	2	1	1	1	1	2	1	1	2	2	1	1
0	1	1	1	1	1	1	1	1	1	1	1	1	1	1	1	1	1	1	1	1	1	1	1	1	1	2	1	1	2	1	1	1	2	1	1	2	1	2	1	1	1	1	1	2	1
0	2	1	1	1	1	1	1	2	1	1	1	1	1	1	1	1	1	1	1	2	2	1	1	1	1	1	4	1	1	1	1	1	2	2	1	2	1	1	2	1	0	2	2	2	1
0	2	2	1	1	1	1	1	1	1	1	1	1	1	1	1	1	1	1	4	1	1	1	4	1	1	4	1	1	3	1	1	1	2	2	1	2	1	1	2	1	0	2	2	1	1
0	1	1	1	1	1	1	2	2	1	1	1	1	1	1	1	1	1	1	3	3	3	2	1	1	4	2	1	1	1	1	1	1	1	2	1	2	1	1	1	1	1	2	2	1	1
0	2	1	1	1	1	1	1	1	1	1	1	1	1	1	1	1	1	1	3	3	3	2	3	1	4	2	3	2	3	1	1	1	2	2	1	1	1	1	2	2	0	2	2	2	1
0	1	2	1	1	1	1	1	1	1	1	1	1	1	1	1	1	1	1	2	2	2	1	2	1	4	1	3	4	2	1	1	1	2	2	1	2	1	1	2	1	0	2	2	1	1
0	2	1	1	1	1	1	1	1	1	1	1	1	1	1	1	1	1	1	4	3	3	2	4	2	4	4	1	1	2	1	1	1	2	2	1	2	1	1	2	1	1	2	2	1	1
0	1	3	1	1	1	1	1	1	1	1	1	1	1	1	1	1	1	1	2	2	3	2	2	1	1	2	1	1	2	1	1	1	1	2	1	2	1	1	2	1	0	2	2	1	1
0	2	1	1	1	1	1	1	2	1	1	1	1	1	2	1	1	1	1	3	3	2	1	2	1	1	4	4	2	1	1	1	1	1	2	1	2	1	1	2	1	1	2	2	1	1
0	1	1	1	1	1	1	1	2	1	1	1	1	1	1	1	1	1	1	3	3	3	4	1	1	3	1	4	1	3	1	1	1	2	2	1	2	1	1	2	1	1	2	2	1	1
0	1	2	1	1	1	2	1	1	2	2	1	1	1	1	1	1	1	1	1	1	1	1	4	1	1	4	1	1	3	1	1	1	1	1	2	1	1	1	1	1	1	1	2	1	2
0	1	1	1	1	1	1	1	1	1	1	1	1	1	1	1	1	1	1	1	3	4	2	1	3	2	4	1	1	2	1	1	1	2	2	1	2	1	2	2	1	0	2	2	1	1
0	2	1	1	1	2	2	1	1	1	1	1	1	1	2	1	1	1	1	3	2	4	3	2	3	2	2	2	2	1	1	1	1	2	2	1	2	1	1	2	1	1	2	2	1	1
0	2	2	1	1	1	1	1	1	1	1	1	1	1	1	1	1	1	1	4	1	1	4	4	4	1	1	4	2	2	1	1	1	1	1	1	2	1	1	2	1	1	2	2	1	1
0	1	1	1	1	1	2	1	1	1	1	1	1	1	1	1	1	1	1	3	3	3	3	3	1	3	3	3	1	3	1	1	1	2	2	1	1	1	1	1	1	2	2	2	1	2
1	2	1	1	1	1	1	1	1	1	1	1	1	1	1	1	1	1	1	1	2	1	3	4	2	1	4	1	1	2	1	1	1	2	1	1	1	1	1	1	1	0	2	2	1	1
0	1	2	1	1	1	1	1	1	1	1	1	1	1	1	1	1	2	1	1	1	2	2	3	4	4	4	4	3	1	1	1	1	2	2	3	1	1	1	1	1	1	1	2	1	1
0	1	2	1	1	1	1	1	2	1	1	1	1	1	1	1	1	2	1	1	3	1	1	1	1	1	4	4	1	1	1	1	2	2	2	1	2	1	1	1	1	1	2	1	2	2
0	2	1	1	1	1	1	1	1	1	1	1	1	1	1	1	1	1	1	1	4	1	4	4	2	4	2	4	4	1	1	1	1	1	1	2	2	1	1	2	2	0	2	2	1	1
0	2	2	1	1	1	1	1	1	2	2	1	1	1	1	1	1	1	1	2	3	1	1	1	1	1	2	1	2	1	1	1	1	2	1	2	2	1	1	1	1	0	2	2	2	1
0	1	3	1	1	1	1	1	1	1	1	1	1	1	1	1	1	1	1	4	1	4	4	1	4	4	1	4	4	1	1	1	1	2	1	1	2	1	2	2	1	1	2	2	2	1
0	1	2	1	1	1	1	1	1	1	1	1	1	1	1	1	1	1	1	1	2	1	2	3	1	1	4	2	1	2	1	1	1	2	2	1	2	1	1	2	1	1	2	2	2	2
0	1	1	1	1	1	1	1	1	1	1	1	1	1	1	1	1	1	1	2	3	1	1	4	1	2	4	1	1	1	1	1	1	3	2	1	2	1	1	2	1	2	1	2	2	2
0	2	1	1	1	1	1	1	1	1	1	1	1	1	1	1	1	1	1	1	1	1	1	4	1	1	4	1	1	3	1	1	1	2	1	2	2	3	2	2	1	1	2	2	2	1
0	2	1	1	1	1	1	1	1	1	1	1	1	1	1	1	1	1	1	2	3	4	1	2	1	3	2	1	1	2	1	1	1	1	1	2	2	3	2	1	1	0	1	2	2	1
0	2	1	1	1	1	1	1	1	2	1	1	1	1	1	1	1	2	1	2	2	2	1	4	2	1	4	2	1	2	1	1	1	2	2	2	2	3	2	2	1	1	2	2	2	1
0	1	2	1	1	1	1	1	1	2	1	2	1	1	1	1	1	1	1	2	2	2	2	4	2	2	4	2	2	1	1	1	1	2	2	2	2	3	1	2	1	0	2	2	2	1
0	1	1	1	1	1	1	1	1	1	1	1	1	1	1	1	2	1	1	1	2	1	2	4	1	1	4	1	1	2	1	1	1	1	2	2	2	1	2	2	1	1	2	2	1	2
0	1	2	1	1	1	1	1	1	2	2	1	1	1	1	1	1	1	1	3	1	1	1	4	1	1	2	1	1	2	1	2	2	2	2	2	2	3	1	2	1	0	2	2	1	1
0	2	1	1	1	1	1	1	1	1	1	1	1	1	1	1	1	1	1	1	1	1	1	4	1	1	4	1	1	2	1	1	2	2	2	2	2	3	2	2	2	0	2	2	1	1
0	2	1	1	1	1	1	1	1	1	1	1	1	1	1	1	1	1	1	1	1	1	1	4	1	1	4	1	1	3	1	1	1	2	2	3	2	3	1	1	1	1	2	2	1	1
0	1	1	1	1	1	1	1	1	2	1	1	1	1	1	1	1	1	1	1	2	2	2	2	1	4	4	1	1	1	1	1	1	3	2	2	2	3	1	1	1	1	2	2	1	2
0	1	1	1	1	1	1	1	2	1	1	1	1	1	1	1	1	1	1	1	1	1	2	4	1	1	4	1	1	2	1	1	2	2	2	3	2	3	1	1	2	1	2	2	1	1
0	2	2	2	2	1	1	2	2	2	1	1	1	1	1	2	1	1	1	1	1	1	1	4	1	1	4	1	1	1	2	1	1	3	1	3	2	3	1	1	1	1	1	2	1	2
0	2	2	1	1	1	1	1	1	1	1	1	1	1	1	1	1	1	1	1	1	2	3	1	1	1	1	1	1	3	1	1	1	2	2	1	2	3	1	2	1	1	2	2	1	1
0	2	1	1	1	1	1	1	1	1	1	1	1	1	1	1	1	1	1	4	3	1	1	1	2	1	1	2	4	3	1	1	1	2	2	3	2	3	1	2	1	1	2	2	1	1
0	1	2	1	1	1	1	1	1	1	1	1	1	1	1	1	1	1	1	3	3	2	2	4	2	2	3	1	2	3	1	2	2	2	2	4	2	3	2	1	1	1	2	2	1	1
0	1	1	1	1	1	1	1	1	1	1	1	2	1	1	1	1	1	1	1	1	1	1	1	1	1	2	1	1	1	1	1	1	2	2	2	2	3	1	2	1	1	2	2	1	1
0	1	1	1	1	1	1	1	1	1	1	1	1	1	1	1	1	1	1	1	1	1	1	2	1	3	3	2	1	3	1	1	1	2	2	1	2	1	1	2	1	0	2	2	1	1
0	2	1	1	1	1	1	1	1	2	1	1	1	1	2	1	1	1	1	1	1	2	1	1	1	1	1	1	1	3	1	1	2	2	2	1	2	2	1	2	1	1	2	2	1	1
0	2	1	1	1	1	1	1	1	1	1	1	1	1	1	1	1	2	1	4	3	4	2	1	1	4	4	4	4	2	1	1	1	1	2	2	2	1	1	2	1	1	2	2	1	1
0	2	3	1	1	1	1	1	1	1	1	1	1	1	1	1	1	1	1	1	1	1	1	4	1	1	3	1	1	2	1	1	2	2	1	1	1	1	1	1	1	1	2	2	1	1
0	1	2	2	1	1	1	1	1	1	1	1	1	1	1	1	1	1	1	1	1	1	4	2	1	1	2	1	1	2	1	1	1	1	2	2	1	1	1	1	1	1	1	2	2	1
0	2	1	1	1	1	1	1	2	1	1	1	1	1	2	2	1	1	1	1	1	1	1	1	1	3	4	1	1	1	1	2	2	2	2	1	2	1	1	1	1	1	2	2	2	1
0	1	1	2	1	1	1	1	1	1	1	1	1	1	1	1	1	1	1	1	1	1	4	4	1	1	4	1	1	2	1	1	1	2	2	1	1	1	1	2	1	1	2	2	1	1
0	1	2	1	1	1	1	1	1	1	1	1	1	1	2	1	1	1	1	1	1	1	4	4	1	1	2	1	1	2	1	1	1	1	2	1	2	1	2	1	1	1	2	2	1	1
0	1	1	1	1	1	1	1	1	1	1	1	1	1	1	1	1	1	1	3	3	2	1	2	3	3	4	3	3	1	1	1	1	1	2	3	1	1	1	2	1	0	2	2	1	1
0	1	1	1	1	1	1	1	1	1	1	1	1	1	1	1	1	1	1	2	2	1	1	1	1	2	1	3	1	2	1	1	1	2	1	2	2	1	2	2	1	1	2	2	1	1
0	2	3	1	1	1	1	1	1	1	1	1	1	1	1	1	1	1	1	4	3	4	2	2	1	1	1	1	1	3	1	1	1	2	1	1	2	1	1	2	1	1	2	2	1	1
0	1	3	1	1	1	1	1	1	1	1	1	1	1	1	1	1	2	1	2	3	1	3	4	1	3	4	1	1	2	1	1	2	2	1	1	2	1	1	2	1	1	1	2	1	1
0	2	1	1	1	1	1	1	1	1	1	1	1	1	1	1	1	1	1	3	1	3	3	2	1	1	3	2	1	2	1	1	2	1	1	1	2	1	1	2	1	1	2	2	1	1
0	1	1	1	1	1	1	1	1	1	1	1	1	1	1	1	1	1	1	4	2	3	2	1	1	3	1	1	1	3	1	1	1	2	1	3	1	1	1	2	1	1	2	2	1	1
0	1	1	1	1	1	1	1	1	1	1	1	1	1	1	1	1	1	1	3	4	4	4	1	3	4	1	4	2	2	1	1	1	1	1	3	1	1	2	1	1	0	1	2	1	1
0	2	1	1	1	1	1	1	1	2	2	1	1	1	1	1	1	1	1	2	2	2	4	1	1	4	4	4	1	2	1	1	1	2	2	2	1	1	1	2	1	1	2	2	1	2
